1     **Title:** Shared morphological consequences of global warming in North American migratory  
2     birds

3  
4     **Short Title:** Recent morphological shifts in migratory birds

5  
6     **Authors:** Brian C. Weeks<sup>a</sup>, David E. Willard<sup>b</sup>, Aspen A. Ellis<sup>a</sup>, Max L. Witynski<sup>b</sup>, Mary  
7     Hennen<sup>b</sup>, Benjamin M. Winger<sup>a</sup>

8  
9     **Author Affiliations:** <sup>a</sup> Museum of Zoology and Department of Ecology and Evolutionary  
10    Biology, University of Michigan, Biological Sciences Building, 1105 N. University Avenue,  
11    Ann Arbor, MI 48109. <sup>b</sup> Gantz Family Collection Center, The Field Museum, 1400 S. Lake  
12    Shore Dr., Chicago, IL 60605.

13  
14    **Corresponding Author:** Benjamin M. Winger; address: 2018 Biological Sciences Building,  
15    1105 N. University Avenue, Ann Arbor, MI 48109; tel: (734) 763-3379; [wingerb@umich.edu](mailto:wingerb@umich.edu).

16  
17    **Keywords:** climate change, body size, morphology, migration, allometry

18        **ABSTRACT**

19

20        Increasing temperatures associated with climate change are predicted to cause reductions in body  
21        size, a key determinant of animal physiology and ecology. Using a four-decade specimen series  
22        of 70,716 individuals of 52 North American migratory bird species, we demonstrate that  
23        increasing annual summer temperature over the 40-year period drove consistent reductions in  
24        body size across these diverse taxa. Concurrently, wing length – which impacts nearly all aspects  
25        of avian ecology and behavior – has consistently increased across taxa. Our findings suggest that  
26        warming-induced body size reduction is a general response to climate change, and reveal a  
27        similarly consistent shift in an ecologically-important dimension of body shape. We hypothesize  
28        that increasing wing length represents a compensatory adaptation to maintain migration as  
29        reductions in body size have increased the metabolic cost of flight. An improved understanding  
30        of warming-induced morphological changes, and their limits, are important for predicting biotic  
31        responses to global change.

32

## 33 INTRODUCTION

34

35           Body size is an essential determinant of animal ecology and life history (Brown 1995;  
36 McGill *et al.* 2006), influencing the allometry of physiological (Hudson *et al.* 2013) and  
37 morphological (Gould 1966; Outomuro & Johansson 2017) functions, as well as fundamental  
38 community ecology interactions (e.g. social hierarchies (Prum 2014), competition, and predator-  
39 prey dynamics (Yodzis & Innes 2002)) (McGill *et al.* 2006). Within species, there is evidence  
40 that individuals tend to be smaller in the warmer parts of their ranges (an intra-specific derivative  
41 of Bergmann's rule (Bergmann 1847; Rensch 1938; Mayr 1956; Blackburn *et al.* 1999)). This  
42 association between warmer temperatures and smaller bodies suggests that anthropogenic  
43 climate change may cause intraspecific shifts toward smaller body size in a temporal analog to  
44 geographic patterns. However, despite the widespread appreciation of the fundamental  
45 importance of body size for ecological and evolutionary processes, the drivers and universality of  
46 temperature-body size relationships across space and time remain contested (Riemer *et al.* 2018).  
47 Understanding whether rapid body size reductions are occurring in response to increased  
48 temperatures is essential to predicting the impacts of climate change on life history, ecosystem  
49 dynamics, and the capacity of species to persist in a warming world.

50           Although the possibility of body size reduction in response to global warming has been  
51 suggested for decades (Smith *et al.* 1995; Yom-Tov 2001), empirical support remains mixed  
52 (Goodman *et al.* 2012; McCoy 2012; Salewski *et al.* 2014; Teplitsky & Millien 2014; Collins *et*  
53 *al.* 2017a, b; Dubos *et al.* 2018). This uncertainty may be in part due to a scarcity of  
54 morphological time series datasets containing sufficiently dense sampling to test the influence of  
55 local temporal fluctuations on body size (as opposed to simply associating long-term

56 morphological trends with periods of global warming), and to do so across many co-distributed  
57 species that experience similar climatic regimes. Additionally, densely sampled time-series  
58 datasets frequently do not have measurements from enough body parts to distinguish changes in  
59 body size from changes in body shape that may be driven by alternate selection pressures.  
60 Consequently, the influence of warming-driven changes in body size on ecologically-important  
61 dimensions of allometry remains largely unknown.

62           Migratory birds that breed at high latitudes are an important system for understanding the  
63 adaptive responses of biota to increasing temperatures, as they are particularly vulnerable to the  
64 impacts of climate change. Not only is the most accelerated change occurring at higher latitudes  
65 (Soja *et al.* 2007; Contribution to the Fifth Assessment Report of the Intergovernmental Panel on  
66 Climate Change 2014), but climate change impacts can vary across the geographically disparate  
67 seasonal ranges of migratory species, resulting in complex dynamics such as phenological  
68 mismatches between species' annual cycles and the resources upon which they depend  
69 (Charmantier & Gienapp 2014). Migratory birds are under strong selection for high site fidelity,  
70 and any perturbation that hinders an efficient return to the breeding grounds is likely to reduce  
71 reproductive success (Winger *et al.* 2018). The extreme energetic demands of migration have  
72 shaped the morphology of migratory birds for the efficiency necessary to conduct these long-  
73 distance flights; therefore, should warming temperatures force body size reductions in migratory  
74 birds, concurrent changes in body shape related to the allometry of flight efficiency may be  
75 necessary to maintain migratory patterns that have evolved over millennia (Møller *et al.* 2017;  
76 Schmaljohann & Both 2017). Although migratory species have garnered significant attention  
77 from researchers interested in biotic responses to rapid environmental change, particularly as  
78 relates to phenology and geographic range, the extent to which migratory birds are changing size

79 in response to anthropogenic global warming remains uncertain (Van Buskirk *et al.* 2010;  
80 Salewski *et al.* 2014; Collins *et al.* 2017a; Dubos *et al.* 2018) and the implications of size change  
81 for maintaining physiologically demanding seasonal migrations are unknown.

82 A persistent challenge in understanding recent morphological changes in migratory birds  
83 is the characterization of size and shape (Yom-Tov *et al.* 2006; Salewski *et al.* 2010; Van  
84 Buskirk *et al.* 2010). Frequently used indices to assess changes in avian body size through time,  
85 such as mass and wing length, are problematic; mass is highly variable for migratory species,  
86 given rapid fat gains and losses during migration (Alerstam & Lindström 1990; Morris *et al.*  
87 1996), and wing length is highly correlated with migratory distance (Förschler & Bairlein 2011).  
88 Nevertheless, studies on recent body size changes in birds have often represented body size using  
89 univariate measures of wing length or mass, making it difficult to identify changes in body size  
90 with precision and disentangle them from shifts in shape (e.g. relative wing length) that may be  
91 driven by other factors. Wing length is a highly consequential trait in birds that reflects a  
92 complex balance of selection pressures from predator avoidance (Witter & Cuthill 1993;  
93 Kullberg *et al.* 1996; Swaddle & Lockwood 1998; Martin *et al.* 2018), to flight efficiency  
94 (Rayner 1988; Pennycuik 2008), to foraging behavior (Norberg 1979; Fitzpatrick 1985; Miles *et*  
95 *al.* 2002; Ricklefs & Cox 2006). Thus, distinguishing between body size change and shifts in  
96 wing length is critical for understanding the ecological consequences of anthropogenically-  
97 driven environmental change on migratory birds. This distinction is particularly important as  
98 warming temperatures are predicted to reduce body size in birds (Yom-Tov *et al.* 2006; Van  
99 Buskirk *et al.* 2010; Gardner *et al.* 2011; Andrew *et al.* 2017, 2018), whereas observed warming-  
100 driven changes in migratory phenology, geographic range and habitat (Bowlin & Wikelski 2008;  
101 Tingley *et al.* 2009; Förschler & Bairlein 2011; Hahn *et al.* 2016; Møller *et al.* 2017; Socolar *et*

102 *al.* 2017) have been predicted to select for increases in wing length, potentially resulting in an  
103 ecologically-important change in shape (i.e. relative wing length). However, the conflation of  
104 wing length and body size has, to-date, largely precluded nuanced analyses of changes in body  
105 size and wing allometry (Zink, R. M. and Remsen 1986; Van Buskirk *et al.* 2010).

106 Here, using a densely-sampled specimen time series of 52 North American migratory  
107 bird species, we develop a robust understanding of changes in body size and shape in migratory  
108 birds throughout a four-decade period of rapid global change. We take advantage of the  
109 ecological diversity of the species studied (see *Ecology and Natural History*, Supporting  
110 Information) to test for the presence of consistent morphological change driven by fundamental  
111 physiological processes. Specifically, we tested whether increasing temperatures since 1978 have  
112 driven reductions in body size. To isolate the impact of temperature on body size, we control for  
113 alternate large-scale environmental and climatic variables (precipitation and primary  
114 productivity) that could conceivably affect such a diverse set of species. Furthermore, we  
115 leverage the multi-decadal and densely-sampled nature of our data to test the influence not only  
116 of long-term trends in temperature but also of short-term fluctuations, and in doing so test causal  
117 factors of body size change. The multidimensional nature of our mensural data further allowed  
118 us to also test how relative wing has changed over the same time period alongside body size.  
119 Species' capacities for shifts in ecologically-relevant morphological traits, like body size and  
120 wing length, are an essential aspect of adaptation to changing local conditions (Hoffmann &  
121 Sgró 2011). Therefore, when predicting biotic responses to anthropogenic global change, a  
122 nuanced understanding of the trajectories of morphological size and shape across species in a  
123 community is an important complement to studies of macroecological changes such as  
124 phenology and geographic range.

125

## 126 **Methods**

127 *Specimen and data collection.* Since 1978, The Field Museum's collections personnel  
128 and volunteers have operated a salvage operation to retrieve birds that collided with buildings in  
129 Chicago, IL, USA during their spring or fall migrations (Fig. S1), resulting in approximately  
130 87,000 bird carcasses of more than 200 species brought to the Field Museum from the Chicago  
131 area. All measurements included in this study were made by a single person - David E. Willard -  
132 who measured the following morphological characteristics on fresh or thawed carcasses prior to  
133 preparation as specimens, which should improve the precision of measurements compared to  
134 measurements of live birds or dried specimens: 1) tarsus length and bill length using digital  
135 calipers; 2) the length of the relaxed wing using a wing rule; and 3) mass using a digital scale.  
136 The carcasses were prepared as specimens, and skull ossification (an indication of age), fat  
137 levels, sex (from gonadal inspection) and molt were recorded. Skull ossification (Pyle 1997)  
138 enabled aging to Hatch Year (HY) or After Hatch Year (AHY). We filtered the dataset (see  
139 Supporting Information for details) to 70,716 individuals from 52 species from 1978-2016.  
140 These species are from 11 families and 30 genera of mostly passerines (Table S1). Most species  
141 in this dataset breed in boreal or temperate forest or edge habitats, but some species are grassland  
142 or marsh specialists, and their winter ranges, habitats, migratory distances, life histories and  
143 ecologies are diverse (see *Ecology and Natural History*, Supporting Information).

144 To test for morphological change through time (eqn 1) and the impacts of environmental  
145 and climatic variables on morphology (eqn 2), we used two different modeling approaches. We  
146 conducted frequentist linear regressions, with the equation-specific independent variables as well  
147 as species and year as fixed effects. We also built mixed-effects models, implemented within a

148 Bayesian framework, treating species as a random effect and accounting for phylogenetic  
149 relatedness and auto-correlation of variables through time (these models are presented in the  
150 Supporting Information, *Bayesian mixed modeling framework*, for details).

151 *Characterizing change in body size through time.* To quantify intra-specific changes in  
152 body size from 1978 – 2016, we compared changes in three indices of body size: tarsus, mass  
153 and the first axis of a principle component analysis of tarsus, wing, bill and mass.

154 We modeled the change in tarsus for all specimens that had data on tarsus, year, sex, age  
155 (HY or AHY) and species ( $n = 58,475$ ). We used the group-centered logarithms of tarsus for  
156 each species as the dependent variable (the logarithm of each tarsus length was taken, and then  
157 data within each species was scaled to have a mean of zero and standard deviation of one). For  
158 the fixed effects modeling approach, we used a linear model implemented using the ‘lm’  
159 function in R (R Core Team 2018):

160  $\log(\text{tarsus})_{\text{group centered}} = B_0 + B_1 * \text{year} + B_2 * \text{age} + B_3 * \text{sex} + \text{species} + \text{species} * \text{year}$  (eqn 1).

161 We repeated our analysis of changing body size through time (eqn 1), using  
162  $\log(\text{mass})_{\text{group centered}}$  rather than tarsus as the proxy for body size.

163 We also conducted a principle components analysis (PCA) of  $\log(\text{tarsus})$ ,  $\log(\text{wing}$   
164  $\text{length})$ ,  $\log(\text{bill length})$ , and  $\log(\text{cube root of mass})$  for all specimens for which we had data on  
165 all measurements ( $n = 48,338$ ) using the ‘princomp’ function in R (R Core Team 2018). Species  
166 scores on the first axis of the PCA (PC1) were used as a metric of body size (as is common  
167 practice, e.g. (Grant & Grant 2008)). Because all variables were positively loaded onto PC1, and  
168 are expected to scale positively with body size, we interpreted PC1 scores as positively related to  
169 body size. As with tarsus and mass, we repeated eqn 1 with group centered PC1 scores.



170 *Change in Wing Length Through Time.* Wing length was modeled substituting log(wing  
171 length)<sub>group centered</sub> for tarsus in eqn 1 ( $n = 62,628$ ). In addition to raw wing length, we modeled  
172 body size-corrected wing length by regressing log(wing length) onto log(tarsus) for each species  
173 ( $n = 58,304$ ) and using the residuals as the dependent variable.

174 *Environmental Variables.* To test hypotheses on the mechanisms underlying changes in  
175 body size and wing length, we generated species-specific estimates of climatic and  
176 environmental variables (temperature, precipitation, and Normalized Difference Vegetation  
177 Index [NDVI], a proxy for resource availability) on the breeding and wintering grounds through  
178 time and tested whether they were associated with changes in adult body size. We cropped  
179 breeding, wintering and resident ranges for all species (BirdLife International 2015) to exclude  
180 unlikely breeding destinations for birds passing through Chicago; we also tested the sensitivity of  
181 model results to variations in how ranges were cropped (Supporting Information, Fig. S1). For  
182 each species, we then calculated mean temperature, mean precipitation, and maximum mean  
183 NDVI through time (1981-2016) in the region representing the likely breeding grounds (June)  
184 and on the likely wintering grounds (December) for each species (see Supporting Information).

185 *Modeling morphology as a function of environmental and climatic variables.* To test the  
186 impacts of these variables on body size, we modeled tarsus for AHY specimens (HY birds were  
187 excluded as they had not experienced winter conditions yet) from 1981 – 2016 ( $n = 29,702$ ).  
188 Summer NDVI and summer precipitation were highly correlated ( $R = 0.56$ ), so summer NDVI  
189 was not included in the model. The environmental and climate data for the breeding and  
190 wintering seasons preceding collection of an individual were used. In order to test whether the  
191 relationships between summer variables and body size were similar across both age classes, we

192 modeled the tarsus length of all specimens using eqn 2, but excluding the winter variables, and  
193 including age as a predictor.

194 The analysis of body size as a function of environmental and climatic variables was  
195 conducted separately using tarsus or PC1 as the index of body size: body size (i.e.  $\text{tarsus}_{adults, group}$   
196  $_{centered}$  or  $\text{PC1}_{adults, group centered}$ ) =  $B_0 + B_1 * \text{year} + B_2 * \text{breeding season precipitation} + B_3 * \text{breeding}$   
197  $\text{season temperature} + B_4 * \text{wintering season precipitation} + B_5 * \text{wintering season temperature} +$   
198  $B_6 * \text{wintering season NDVI} + B_7 * \text{sex} + B_8 * \text{season} + \text{species} + \text{species} * \text{year}$  (eqn 2). Wing length  
199 was similarly modeled using eqn 2.

200 The relative importance of each variable for explaining variance in body size was  
201 compared by re-fitting the model across all permutations of model specification and calculating  
202 the  $R^2$  partitioning across those orders (Lindeman *et al.* 1980), implemented using the  
203 “calc.relimp” function in the “relaimpo” package in R (Grömping 2006; R Core Team 2018).

204 To test the sensitivity of our results to uncertainty in AHY age, we compared the results  
205 of the tarsus model (eqn 2) to those derived from using the climatic and environmental data from  
206 each of the three years preceding collection (Supporting Information).

207

## 208 **RESULTS**

209

### 210 **A consistent reduction in body size and increase in wing length in boreal-temperate** 211 **migratory birds**

212

213 Despite the ecological and phylogenetic diversity among species, we found consistent  
214 reductions in body size across species over the course of the study (Fig. 1, Fig. 2, Fig. 3A, Fig.

215 S2). These reductions in body size were recovered regardless of whether we assessed body size  
216 using univariate measurements of either mass or tarsus length, or a multivariate index of size  
217 based on the first axis of a principle component analysis of mass, tarsus, wing length, and bill  
218 length [PC1]. For simplicity, we present results using tarsus length, as it is the most appropriate  
219 proxy of intra-specific body size (Zink, R. M. and Remsen 1986; Rising & Somers 1989; Senar  
220 & Pascual 1997), particularly given the extreme variability of mass during migration (Supporting  
221 Information). However, all results presented are qualitatively identical whether we measure body  
222 size as the univariate tarsus length or the multi-variate PC1 (Supporting Information), and  
223 whether we use fixed effects or Bayesian mixed effects models that incorporate phylogenetic  
224 relatedness (Supporting Information). Across our dataset, tarsus (hereafter, body size) declined  
225 significantly through time ( $P < 0.01$ ) and in nearly all species, and these declines were consistent  
226 across age and sex classes (Figs 1 and 2A, Fig. S2).

227         Body size is positively linearly correlated with wing length ( $R = 0.84$  across all species,  
228 mean of  $R = 0.28$  within species). Nevertheless, as body size declined over time, wing length  
229 increased ( $P < 0.01$ ; Fig. 2, Fig. S2). This increase was consistent across all species in our study  
230 that showed significant changes in wing length (Fig. 3B). Further, body size-corrected wing  
231 length (the residuals of wing length regressed onto body size) similarly increased over the same  
232 time period ( $P < 0.001$ ), and this trend was nearly universal (90% of species had increases in  
233 relative wing length, and all of the significant changes in relative wing length were positive; Fig.  
234 3C), and was consistent across age and sex classes (Fig. S2). In other words, even those species  
235 that have not undergone increases in absolute wing length nevertheless experienced shifts in  
236 wing allometry that yielded smaller-bodied, longer-winged birds.

237

238 **Increasing summer temperatures drive body size decline**

239

240 We found that the climatic and environmental variable with the greatest explanatory  
241 power for body size—by an order of magnitude—was summer temperature on the breeding  
242 grounds, with increased temperatures associated with reduced body size ( $P < 0.001$ ; Table S7).  
243 Although various factors beyond temperature, such as food abundance and quality, may  
244 contribute to body size reductions (Gardner *et al.* 2011; Sheridan & Bickford 2011; Yom-Tov &  
245 Geffen 2011; Teplitsky & Millien 2014), we did not find evidence that proxies for these factors  
246 (NDVI and precipitation) have driven the trend in body size.

247 Although the exact breeding and wintering locations of individuals in the study are not  
248 known, as specimens were collected from a passage site, all results are robust to uncertainty in  
249 likely breeding locations (Fig. S1). Further, because populations were sampled at a passage site  
250 south of the breeding range and north of the wintering range, rather than a single breeding or  
251 wintering locality, we are likely collecting individuals from across the latitudinal extent of the  
252 species' ranges, and thus observing broad population-level trends rather than single-site  
253 dynamics (Van Buskirk *et al.* 2010).

254

255 **Selection during migration drives increases in wing length**

256

257 The observed increases in wing length were not explained by environmental variables on  
258 either the breeding or wintering grounds (Supporting Information). All variables were either not  
259 significantly associated with relative wing length ( $P > 0.05$ ), or were significantly associated  
260 with wing length but were not changing through time in a way that could produce the observed

261 long-term trend (e.g. a variable may have been significantly positively associated with wing  
262 length, but was declining through time; Supporting Information). Additionally, within years,  
263 wings were proportionately longer in spring populations than in populations collected during the  
264 previous fall migration ( $P < 0.05$ ; Fig. 4B). Notably, in addition to wing length being longer in  
265 spring populations, wing length is increasing faster through time in spring birds (Fig. 4B),  
266 suggesting selective pressures for increased wing length during migration have been increasing  
267 over the course of the study period (see *Discussion*).

268

## 269 **DISCUSSION**

270

271 Despite a diversity of ecologies, habitats, and geographic ranges, we found a near-  
272 universal reduction in body size over four decades for the 52 species in our data. The association  
273 between temperature and body size recovered by our modeling approach does not reflect merely  
274 a long-term correlation between body size and temperature; rather, it also reflects significantly  
275 correlated short-term fluctuations after controlling for the long-term trends (Fig. 4A). This result  
276 suggests a causal relationship (Methods; (Angrist J. D. and J. S. Pischke 2008)), wherein  
277 increasing summer temperatures drive reductions in body size. While other studies have found  
278 less consistent reductions in body size in migratory birds (Yom-Tov *et al.* 2006; Salewski *et al.*  
279 2010), this is likely due to the use of mass or wing length as proxies for body size, or smaller  
280 sample sizes. Our findings support the hypothesis that body size reduction may be a widespread  
281 response to global warming (Gardner *et al.* 2011), occurring broadly across species that tend to  
282 be smaller in warmer parts of their range.

283           Developmental plasticity and selection represent two potential, non-exclusive,  
284 mechanisms underlying the observed changes in body size in our data. Experimental studies have  
285 shown that increased temperatures during nesting can lead to a reduction in avian adult body size  
286 through developmental plasticity (Andrew *et al.* 2017), raising the possibility that the consistent  
287 patterns of body size reduction we observe may be a plastic response to increased temperatures  
288 during development. Species could also be evolving in response to changing selection pressure  
289 on body size. Cold weather metabolic demands are classically invoked to explain Bergmann's  
290 rule (or are considered an integral part of the rule (Watt *et al.* 2010)), with the smaller ratio of  
291 surface area to volume that accompanies increased body size considered beneficial in colder  
292 climates (Gardner *et al.* 2011; Sheridan & Bickford 2011; Teplitsky & Millien 2014). As such,  
293 warming temperatures could conceivably relax selection for larger body size, indirectly leading  
294 to size reduction. However, the migratory birds in our study vacate the coldest parts of their  
295 ranges during the winter (Winger *et al.* 2018) and also winter in a wide variety of climatic  
296 conditions. We found that changes in temperatures on these diverse wintering grounds were not  
297 strongly associated with body size changes, suggesting that relaxed cold-season selection  
298 pressures on body size are unlikely to explain the observed trends. The observed correlated  
299 short-term fluctuations between temperature and body size (Table S7), which were particularly  
300 pronounced in hatch year birds (Fig. 4A), suggest a potentially important role for developmental  
301 plasticity, particularly given recent experimental evidence for temperature-induced  
302 developmental plasticity in body size in passerine birds (Andrew *et al.* 2018). However, it is  
303 possible that a combination of developmental plasticity and relaxed selection against smaller  
304 body size has yielded the near-universal pattern of body size reduction observed in our data.

305 More complex ecological dynamics of global change may also contribute to body size  
306 reduction, such as food limitation as a result of climate change-driven phenological mismatches  
307 (Both *et al.* 2006). Given the observational nature of our data, it is not possible to completely  
308 rule out alternative, non-climatic selective pressures (e.g. reduced food availability), particularly  
309 if these processes are themselves driven by cyclical fluctuations in temperature. However,  
310 because the relationship between temperature and body size is evident after controlling for the  
311 long-term trends in the data, an alternative mechanism would need to exhibit both a 40-year  
312 correlation with body size as well as correlated short-term fluctuations matching those of body  
313 size (Fig. 4A). Further, the near-universality of the morphological changes across the species in  
314 our study — which are ecologically diverse and breed and winter in a wide variety of habitats  
315 with different phenological dynamics — supports a role for fundamental metabolic or  
316 physiological processes influencing the observed trends.

317 Why has relative wing length increased as body size has declined in nearly all 52 species  
318 in our study? In our model results, no climatic or environmental variables on the breeding or  
319 wintering grounds explained the long-term increase in wing length (Supporting Information).  
320 Together with our finding that spring birds have longer wings than fall birds and that this  
321 seasonal difference is widening through time, these results suggest that positive selection for  
322 longer relative wings is occurring during migration. These seasonal differences in wing length  
323 are likely driven in part by selection on hatch-year birds, which, in many species, tend to have  
324 shorter wings [Fig. S2, 68]. Such a pattern of longer wings in spring versus fall could thus  
325 alternatively be explained by elevated mortality rates for hatch-year birds that is unrelated to  
326 selection on their shorter wing length. However, not only do we find that wing length is longer in  
327 spring migrants than fall migrants, but this seasonal difference is increasing through time (Fig.

328 4B), and wing length is also increasing through time across all age classes (Fig. S2). We interpret  
329 the total evidence of these patterns to be indicative of a selective advantage for longer wings  
330 during migration that has been increasing over the study period.

331 Longer and more pointed wings are associated with more efficient flight in birds,  
332 particularly for long distance flights such as during migration (Pennycuik 2008), suggesting that  
333 some aspect of recent global change is selecting for more efficient flight across this diverse set of  
334 migratory birds. Indeed, several global change dynamics have been proposed as mechanisms that  
335 should select for increased wing length in migratory birds. These mechanisms include increasing  
336 migratory distances associated with poleward range shifts (Förschler & Bairlein 2011),  
337 phenological advances requiring faster migrations (Hahn *et al.* 2016; Møller *et al.* 2017), and  
338 habitat fragmentation that could require individuals to make longer flights between stopover sites  
339 or disperse further to find breeding territories (Desrochers 2010).

340 Increasing selection for proportionately longer wings during the migratory period could  
341 be a result of increasing migratory distance through time. Migratory distance is positively  
342 correlated with wing length both within and across species in passerines (Winkler & Leisler  
343 1992; Förschler & Bairlein 2011), suggesting that increases in relative wing length through time  
344 could be a response to northward shifts in breeding ranges if wintering ranges have remained  
345 static. However, trajectories of warming-induced range shifts have been idiosyncratic across  
346 North American bird species (Tingley *et al.* 2009; Mayor *et al.* 2017), while the observed  
347 increase in wing length is remarkably consistent across the species in our dataset. Additionally,  
348 our data should be robust to changes in geographic distribution, as has been noted in other  
349 studies using migratory samples to examine morphological change (Van Buskirk *et al.* 2010). All  
350 individuals sampled in our study are from populations that breed north of Chicago and winter



351 south of Chicago, meaning that individuals from across the latitudinal breadth of the breeding  
352 grounds (Fig. S1) are likely to have been sampled in Chicago. As such, the majority of our data  
353 are likely consistently derived from individuals that breed within the core of their species' range  
354 (Van Buskirk *et al.* 2010), whereas range shifts should lead to selection for longer relative wing  
355 lengths at the southern and northern edges of the range. However, identifying the geographic  
356 provenance of individuals in our dataset, and how these may have changed through time, will be  
357 necessary to directly test the relationship between ranges shifts and morphological change. In  
358 addition to investigating how total migratory distances have changed due to latitudinal range  
359 shifts, further research should also address the possibility that habitat fragmentation and  
360 reduction could select for longer winged individuals (Desrochers 2010) without necessitating a  
361 shift of the entire species' range.

362 Phenological studies have suggested that migratory birds may be advancing their spring  
363 migratory timing in response to climate change (Charmantier & Gienapp 2014). In other studies,  
364 birds that migrate earlier and arrive first on the breeding grounds tend to have longer wings than  
365 birds that arrive later (Bowlin 2007; Hahn *et al.* 2016). By assuming that passage time through  
366 Chicago is correlated with arrival time on the breeding grounds, we tested whether longer-  
367 winged birds arrive earlier within years (i.e. does size-corrected wing length predict passage date  
368 in a single year; Supporting Information, eqn 3). Our data indicate that longer-winged ( $P < 0.01$ )  
369 and larger ( $P < 0.05$ ) birds do indeed migrate through Chicago earlier in spring than shorter-  
370 winged and smaller individuals. However, mean spring passage time through Chicago did not  
371 become earlier across years ( $P = 0.31$ ), as would be expected if advancing phenology had  
372 selected for increasing wing length through time (Supporting Information). Therefore, we did not  
373 find strong evidence that selection for earlier migrations has driven increases in wing length.

374 Phenological changes, shifting ranges and habitat fragmentation are all plausible and non-  
375 exclusive selection pressures that could increase wing length among species; eliminating these  
376 competing hypotheses will require a better understanding of the geographic provenance of  
377 individuals through time. However, we suggest that the near-universal change in relative wing  
378 length across the ecologically and geographically diverse species in our dataset may be evidence  
379 of a more fundamental physiological impact of rapid climate change on migratory birds.  
380 Specifically, we hypothesize that increased relative wing length confers a selective advantage as  
381 body size declines — even for simply maintaining current migratory patterns — due to decreased  
382 metabolic efficiency (increased energy required per unit mass; 48) as individuals get smaller.  
383 Increased relative wing length improves flight efficiency by reducing wing loading (Rayner  
384 1988), and may additionally reflect an increase in wing pointedness, which further increases  
385 flight efficiency (Bowlín & Wikelski 2008; Pennycuick 2008). That is, we propose longer  
386 relative wing length may reflect a compensatory adaptation to counter the consequences of  
387 shrinking body size for powered flight in migrants. As expected if relative wing length is  
388 increasing to compensate for reductions in body size, species in our dataset that have become  
389 smaller at faster rates have also experienced faster increases in relative wing length ( $P < 0.05$ ),  
390 though this relationship is sensitive to the modeling approach taken (Supporting Information).  
391 The complexities of the physics of flight and their relationship with migration (Alerstam &  
392 Lindström 1990; Pennycuick 2008; Møller *et al.* 2017), coupled with the dynamic environmental  
393 context of migration as the world changes, preclude definitively identifying a mechanistic link  
394 between reductions in body size and an increase in wing length to maintain migration. However,  
395 understanding if the observed morphological changes in body size and wing length represent a  
396 coupled response to global warming — versus decoupled trends driven by alternate forces — is

397 an important avenue of future research, given the consistency with which body size and wing  
398 length have changed across this diverse group of species.

399 While the increase in relative wing length we identified is likely the result of selection  
400 during migration and may facilitate the maintenance of migration, it also carries trade-offs for  
401 nearly all aspects of avian life history and ecology. Indeed, the tradeoffs associated with  
402 variations in wing length are one of the most fundamental components of avian life history,  
403 impacting nearly all aspects of ecology and behavior (Norberg 1990). Thus, the extent to which  
404 these migratory birds can continue to adapt to rapid global change via shifting wing proportions  
405 remains unknown.

406

## 407 **Conclusions**

408

409 We identify a significant influence of short-term fluctuations in summer temperature on  
410 body size that is consistent with the long-term trends shown across species, providing strong  
411 evidence that warming temperatures are driving reductions in body size across biota. Body size  
412 reduction is likely to have far-reaching ecological consequences (McGill *et al.* 2006). The  
413 concomitant increase in wing length may have similarly expansive ecological implications  
414 (Norberg 1990), particularly as the divergent trends in body size and wing length combine to  
415 drive a change in shape (i.e. increased relative wing length) that may face opposing constraints.  
416 Should size and shape be a coupled response to increasing temperatures, tethered by allometric  
417 relationships and with broad ecological impacts, understanding how temperature-driven  
418 morphological change interacts with shifting phenology geographic range may be essential for  
419 predicting biotic responses to climate change.

420

421 **Acknowledgements:**

422 We thank the staff, curators and volunteers of the Field Museum, and the Chicago Bird Collision  
423 Monitors, for their assistance in salvaging birds. For helpful comments, we thank S. Dubay, N.  
424 Senner, J. Bates, S. Hackett, B. Marks, J. Voight, M. Jain, and M. Zelditch. We thank D.  
425 Megahan for Fig. S1.

426

427 **References**

- 428 Alatalo, R. V., Gustafsson, L. & Lundberg, A. (1984). Why do young passerine birds have  
429 shorter wings than older birds? *Ibis (Lond. 1859)*, 126, 410–415.
- 430 Alerstam, T. & Lindström, Å. (1990). Optimal Bird Migration: The Relative Importance of  
431 Time, Energy, and Safety. In: *Bird Migration*. pp. 331–351.
- 432 Andrew, S.C., Awashy, M., Griffith, A.D., Nakagawa, S. & Griffith, S.C. (2018). Clinal  
433 variation in avian body size is better explained by summer maximum temperatures during  
434 development than by cold winter temperatures. *Auk*, 135, 206–217.
- 435 Andrew, S.C., Hurley, L.L., Mariette, M.M. & Griffith, S.C. (2017). Higher temperatures during  
436 development reduce body size in the zeb finch in the laboratory and in the wild. *J. Evol.*  
437 *Biol.*, 30, 2156–2164.
- 438 Angrist J. D. and J. S. Pischke. (2008). Mostly Harmless Econometrics: An Empiricist's  
439 Companion. *Massachusetts Inst. Technol. London Sch. Econ.*
- 440 Bergmann, C. (1847). Über die verhältnisse der warmeökonomie der thiere zu ihrer grosse.  
441 *Göttinger Stud.*, 1, 595–708.
- 442 BirdLife International. (2015). *IUCN Red List for birds*. Available at: <http://www.birdlife.org>.

- 443 Last accessed 1 January 2015.
- 444 Blackburn, T.M., Gaston, K.J. & Loder, N. (1999). Geographic gradients in body size: A  
445 clarification of Bergmann's rule. *Divers. Distrib.*, 5, 165–174.
- 446 Both, C., Bouwhuis, S., Lessells, C.M. & Visser, M.E. (2006). Climate change and population  
447 declines in a long-distance migratory bird. *Nature*, 441, 81–83.
- 448 Bowlin, M.S. (2007). Sex, wingtip shape, and wing-loading predic arrival date at stopover site in  
449 the Swainson's Thrush (*Catharus ustulatus*). *Auk*, 124, 1388–1396.
- 450 Bowlin, M.S. & Wikelski, M. (2008). Pointed wings, low wingloading and calm air reduce  
451 migratory flight costs in songbirds. *PLoS One*, 3, 1–8.
- 452 Brown, J. (1995). *Macroecology*. The University of Chicago Press, Chicago and London.
- 453 Van Buskirk, J., Mulvihill, R.S. & Leberman, R.C. (2010). Declining body sizes in North  
454 American birds associated with climate change. *Oikos*, 119, 1047–1055.
- 455 Charmantier, A. & Gienapp, P. (2014). Climate change and timing of avian breeding and  
456 migration: Evolutionary versus plastic changes. *Evol. Appl.*, 7, 15–28.
- 457 Collins, M.D., Relyea, G.E., Blustein, E.C. & Badami, S.M. (2017a). Heterogeneous changes in  
458 avian body size across and within species. *J. Ornithol.*, 158, 38–52.
- 459 Collins, M.D., Relyea, G.E., Blustein, E.C. & Badami, S.M. (2017b). Neotropical Migrants  
460 Exhibit Variable Body-Size Changes Over Time and Space. *Northeast. Nat.*, 24, 82–96.  
461 Contribution to the Fifth Assessment Report of the Intergovernmental Panel on Climate Change.  
462 (2014). Climate Change 2013 - The Physical Science Basis. *Clim. Chang. 2013 - Phys. Sci.*  
463 *Basis*, 1542, 1–30.
- 464 Desrochers, A. (2010). Morphological response of songbirds to 100 years of landscape change in  
465 North America. *Ecology*, 91, 1577–82.

- 466 Dubos, N., Le Viol, I., Robert, A., Teplitsky, C., Ghislain, M., Dehorter, O., *et al.* (2018).  
467 Disentangling the effects of spring anomalies in climate and net primary production on  
468 body size of temperate songbirds. *Ecography (Cop.)*, 41, 1319–1330.
- 469 Fitzpatrick, J.W. (1985). Form, foraging behavior, and adaptive radiation in the Tyrannidae.  
470 *Ornithol. Monogr.*, 36, 447–470.
- 471 Förschler, M.I. & Bairlein, F. (2011). Morphological shifts of the external flight apparatus across  
472 the range of a passerine (northern wheatear) with diverging migratory behaviour. *PLoS One*,  
473 6, 1–9.
- 474 Gardner, J.L., Peters, A., Kearney, M.R., Joseph, L. & Heinsohn, R. (2011). Declining body size:  
475 A third universal response to warming? *Trends Ecol. Evol.*, 26, 285–291.
- 476 Goodman, R.E., Lebuhn, G., Seavy, N.E., Gardali, T. & Bluso-Demers, J.D. (2012). Avian body  
477 size changes and climate change: Warming or increasing variability? *Glob. Chang. Biol.*,  
478 18, 63–73.
- 479 Gould, S.J. (1966). Allometry and size in ontogeny and phylogeny. *Biol. Rev.*, 41, 587–638.
- 480 Grant, P.R. & Grant, B.R. (2008). Pedigrees, assortative mating and speciation in Darwin’s  
481 finches. *Proc. R. Soc. B Biol. Sci.*, 275, 661–668.
- 482 Grömping, U. (2006). R package relaimpo: relative importance for linear regression. *J. Stat.*  
483 *Softw.*, 17, 139–147.
- 484 Hahn, S., Korner-Nievergelt, F., Emmenegger, T., Amrhein, V., Csörgo, T., Gursoy, A., *et al.*  
485 (2016). Longer wings for faster springs - wing length relates to spring phenology in a long-  
486 distance migrant across its range. *Ecol. Evol.*, 6, 68–77.
- 487 Hoffmann, A.A. & Sgró, C.M. (2011). Climate change and evolutionary adaptation. *Nature*, 470,  
488 479–485.

- 489 Hudson, L.N., Isaac, N.J.B. & Reuman, D.C. (2013). The relationship between body mass and  
490 field metabolic rate among individual birds and mammals. *J. Anim. Ecol.*, 82, 1009–1020.
- 491 Kullberg, C., Fransson, T. & Jakobsson, S. (1996). Impaired predator evasion in fat blackcaps  
492 (*Sylvia atricapilla*). *Proc. R. Soc. B Biol. Sci.*
- 493 Lindeman, R.H., Merenda, P.F. & Gold, R.Z. (1980). *Introduction to Bivariate and Multivariate*  
494 *Analysis*. Scott Foresman & Co, Glenview, IL.
- 495 Martin, T.E., Tobalske, B., Riordan, M.M., Case, S.B. & Dial, K.P. (2018). Age and  
496 performance at fledging are a cause and consequence of juvenile mortality between life  
497 stages. *Sci. Adv.*
- 498 Mayor, S.J., Guralnick, R.P., Tingley, M.W., Otegui, J., Withey, C., Elmendorf, S.C., *et al.*  
499 (2017). Increasing phenological asynchrony between spring green-up and arrival of  
500 migratory birds. *Sci. Rep.*, 7, 1–10.
- 501 Mayr, E. (1956). Geographical character gradient and climatic adaptation. *Evolution*, 10, 105–  
502 108.
- 503 McCoy, D.E. (2012). Connecticut Birds and Climate Change: Bergmann’s Rule in the Fourth  
504 Dimension. *Northeast. Nat.*, 19, 323–334.
- 505 McGill, B.J., Enquist, B.J., Weiher, E. & Westoby, M. (2006). Rebuilding community ecology  
506 from functional traits. *Trends Ecol. Evol.*, 21, 178–185.
- 507 Miles, D.B., Ricklefs, R.E. & Travis, J. (2002). Concordance of Ecomorphological Relationships  
508 in Three Assemblages of Passerine Birds. *Am. Nat.*, 129, 347-364.
- 509 Møller, A.P., Rubolini, D. & Saino, N. (2017). Morphological constraints on changing avian  
510 migration phenology. *J. Evol. Biol.*, 30, 1177–1184.
- 511 Morris, S.R., Holmes, D.W. & Richmond, M.E. (1996). A ten-year study of the stopover patterns

- 512 of migratory passerines during fall migration on Appledore Island, Maine. *Condor*, 98, 395–  
513 409.
- 514 Norberg, U.M. (1979). Morphology of the Wings, Legs and Tail of Three Coniferous Forest Tits,  
515 The Goldcrest, and the Treecreeper in Relation to Locomotor Pattern and Feeding Station  
516 Selection. *Philos. Trans. R. Soc. B Biol. Sci.*, 287, 131-165.
- 517 Norberg, U.M. (1990). Flight and ecology. In: *Vertebrate Flight*. Springer-Verlag, Berlin,  
518 Heidelberg, pp. 237–256.
- 519 Outomuro, D. & Johansson, F. (2017). A potential pitfall in studies of biological shape: Does  
520 size matter? *J. Anim. Ecol.*, 86, 1447–1457.
- 521 Pennycuik, C.J. (2008). *Modeling the flying bird*. Book. Academic Press, Burlington, MA.
- 522 Prum, R.O. (2014). Interspecific social dominance mimicry in birds. *Zool. J. Linn. Soc.*, 172,  
523 910–941.
- 524 Pyle, P. (1997). Aging, Sexing, and Molt. *Identif. Guid. to North Am. birds, part 1*, 1–6.
- 525 R Core Team. (2018). R: A language and environment for statistical computing.
- 526 Rayner, J.M. V. (1988). *Form and function in avian flight*. *Curr. Ornithol.*, 5, 1-66.
- 527 Rensch, B. (1938). Some problems of Geographical Variation and Species-formation. *Proc.*  
528 *Linn. Soc. London.*, 150, 275-285.
- 529 Ricklefs, R.E. & Cox, G.W. (2006). Morphological Similarity and Ecological Overlap among  
530 Passerine Birds on St. Kitts, British West Indies. *Oikos.*, 29, 60-66.
- 531 Riemer, K., Guralnick, R.P. & White, E.P. (2018). No general relationship between mass and  
532 temperature in endothermic species. *Elife.*, 7, e27166.
- 533 Rising, J.D. & Somers, K.M. (1989). The measurement of overall body size in birds. *Auk*, 106,  
534 666–674.



- 535 Salewski, V., Hochachka, W.M. & Fiedler, W. (2010). Global warming and Bergmann's rule:  
536 Do central European passerines adjust their body size to rising temperatures? *Oecologia*,  
537 162, 247–260.
- 538 Salewski, V., Siebenrock, K.H., Hochachka, W.M., Woog, F. & Fiedler, W. (2014).  
539 Morphological change to birds over 120 years is not explained by thermal adaptation to  
540 climate change. *PLoS One*, 9, 1–14.
- 541 Schmaljohann, H. & Both, C. (2017). The limits of modifying migration speed to adjust to  
542 climate change. *Nat. Clim. Chang.*, 7, 573–576.
- 543 Senar, J.C. & Pascual, J. (1997). Keel and tarsus length may provide a good predictor of avian  
544 body size. *Ardea*, 85, 269–274.
- 545 Sheridan, J.A. & Bickford, D. (2011). Shrinking body size as an ecological response to climate  
546 change. *Nat. Clim. Chang.*, 1, 401–406.
- 547 Smith, F.A., Betancourt, J.L. & Brown, J.H. (1995). Evolution of body size in the woodrat over  
548 the past 25,000 years of climate change. *Science*, 270, 2012–2014.
- 549 Socolar, J.B., Epanchin, P.N., Beissinger, S.R. & Tingley, M.W. (2017). Phenological shifts  
550 conserve thermal niches in North American birds and reshape expectations for climate-  
551 driven range shifts. *Proc. Natl. Acad. Sci.*, 114, 12976–12981.
- 552 Soja, A.J., Tchebakova, N.M., French, N.H.F., Flannigan, M.D., Shugart, H.H., Stocks, B.J., *et*  
553 *al.* (2007). Climate-induced boreal forest change: Predictions versus current observations.  
554 *Glob. Planet. Change*, 56, 274–296.
- 555 Swaddle, J.P. & Lockwood, R. (1998). Morphological adaptations to predation risk in passerines.  
556 *J. Avian Biol.*, 29, 172–176.
- 557 Teplitsky, C. & Millien, V. (2014). Climate warming and Bergmann's rule through time: Is there

558 any evidence? *Evol. Appl.*, 7, 156–168.

559 Tingley, M.W., Monahan, W.B., Beissinger, S.R. & Moritz, C. (2009). Birds track their  
560 Grinnellian niche through a century of climate change. *Proc. Natl. Acad. Sci.*, 106, 19637-  
561 19643.

562 Watt, C., Mitchell, S. & Salewski, V. (2010). Bergmann’s rule; A concept cluster? *Oikos*, 119,  
563 89–100.

564 Winger, B.M., Auteri, G.G., Pegan, T.M. & Weeks, B.C. (2018). A long winger for the Red  
565 Queen: rethinking the evolution of seasonal migration. *Biol. Rev.*

566 Winkler, H. & Leisler, B. (1992). On the ecomorphology of migrants. *Ibis (Lond. 1859)*., 134,  
567 21–28.

568 Witter, M.S. & Cuthill, I.C. (1993). The ecological costs of avian fat storage. *Philos. Trans. - R.*  
569 *Soc. London, B.*, 340, 73-92.

570 Yodzis, P. & Innes, S. (2002). Body Size and Consumer-Resource Dynamics. *Am. Nat.*, 139,  
571 1151-1175.

572 Yom-Tov, Y. (2001). Global warming and body mass decline in Israeli passerine birds. *Proc. R.*  
573 *Soc. B Biol. Sci.*, 268, 947–952.

574 Yom-Tov, Y. & Geffen, E. (2011). Recent spatial and temporal changes in body size of  
575 terrestrial vertebrates: Probable causes and pitfalls. *Biol. Rev.*, 86, 531–541.

576 Yom-Tov, Y., Yom-Tov, S., Wright, J., Thorne, C.J.R. & Du Feu, R. (2006). Recent changes in  
577 body weight and wing length among some British passerine birds. *Oikos*, 112, 91–101.

578 Zink, R. M. and Remsen, J. V. (1986). Evolutionary processes and patterns of geographic  
579 variation in birds. *Curr. Ornithol.*, 4, 1–69.

580

581 **Figure Legends**

582 **Fig. 1. Body size has become smaller through time.** Tarsus length declined in nearly all  
583 species in the dataset (Fig. 3A) with the 9 most highly sampled species shown here. Dashed lines  
584 have a slope of zero and an intercept equal to the mean tarsus length for each species.

585  
586 **Fig. 2. While body size has become smaller, wing length has increased through time.** Lines  
587 represent all species, with measurements group mean centered by species (70,716 specimens  
588 from 52 species). Wing length increased through time ( $P < 0.01$ ), while body size declined  
589 (tarsus, mass and the first principal component of a principal components analysis of tarsus, bill,  
590 wing and mass all declined through time across species;  $P < 0.01$ ,  $P = 0.056$ , and  $P < 0.01$ ,  
591 respectively).

592  
593 **Fig. 3. Morphological change and relationships.** Measurements are group mean centered by  
594 species. Attributes of morphology have changed nearly universally across species (A-C), with  
595 individual species trends in blue (slope p-values are shown), and the trend across all species in  
596 red (all significantly different from zero). (A) Tarsus has declined in 50/52 species, and all  
597 significant changes in tarsus ( $P < 0.05$ ;  $n = 43$ ), represent declines. (B) Wing length has  
598 increased through time, and body size-corrected wing length (C) has increased in 47/52 species,  
599 and all significant changes ( $P < 0.05$ ;  $n = 35$ ) represent increases.

600  
601 **Fig. 4. Evidence for temperature-related body size declines and intra-annual selection on**  
602 **wing length.** (A) In addition to long term correlated trends in tarsus decline and temperature  
603 increase, short term fluctuations in temperature are correlated with short term fluctuations in

604 tarsus length, suggesting a causal relationship in which increasing temperatures are associated  
605 with reductions in body size (dashed lines are linear models, solid lines are general additive  
606 models). (B) Body size-corrected wing length is longer and is increasing at a more rapid rate in  
607 spring birds, reflecting selection for increased wing length during migration.  
608

609 **Figures**

610 **Fig. 1.**

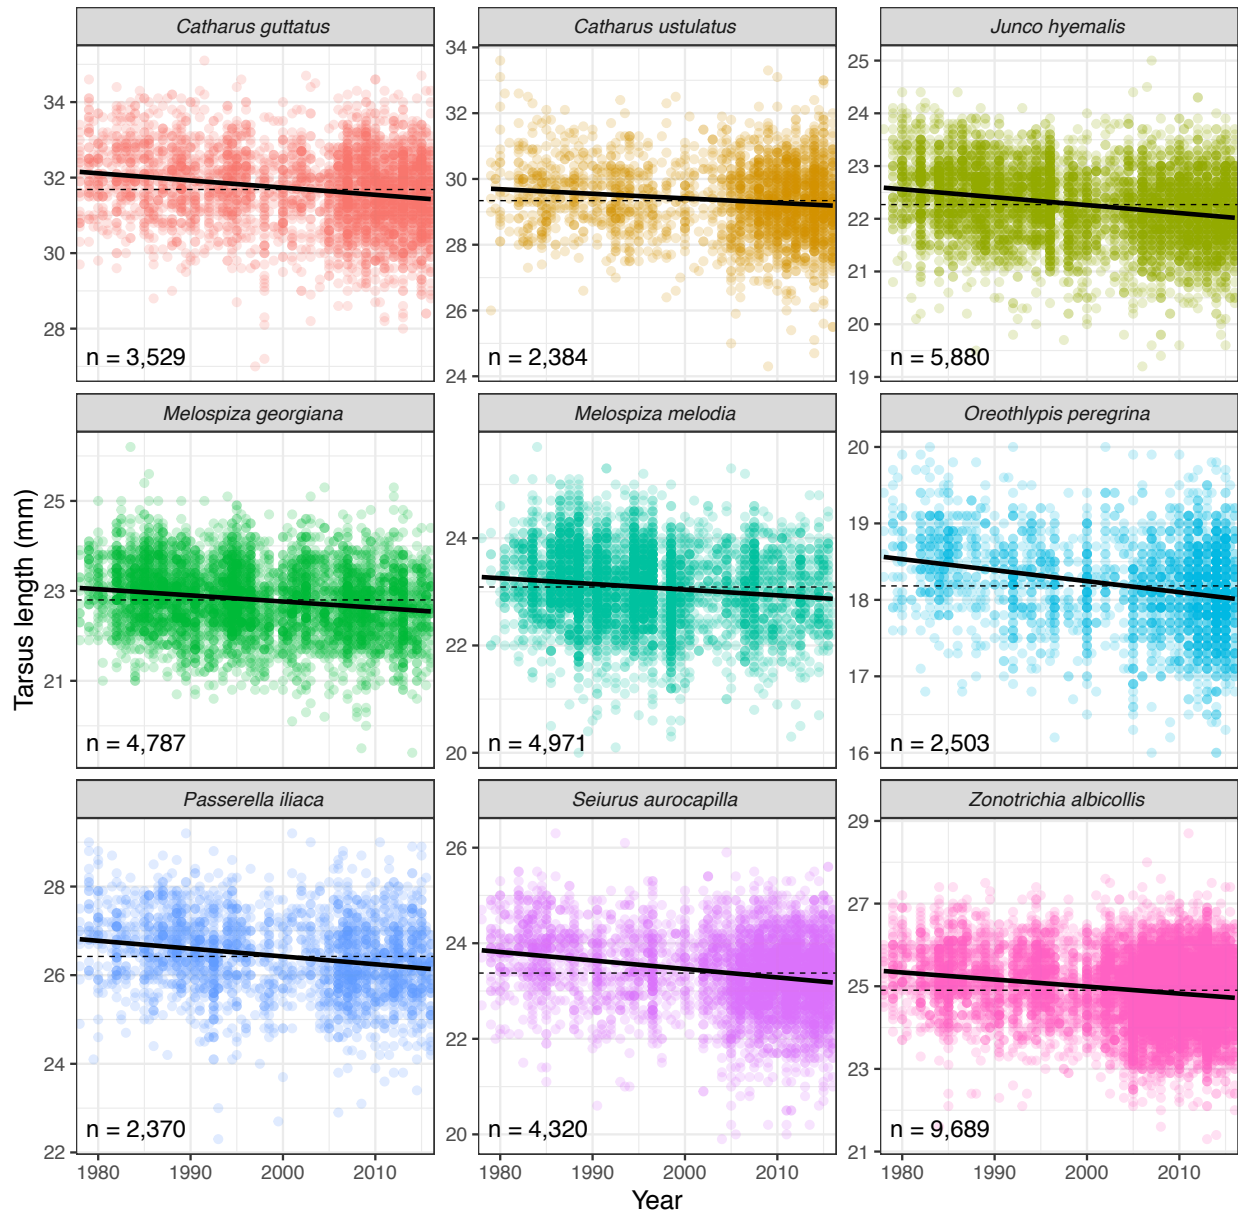

611

612

613

614

615

616 **Fig. 2.**

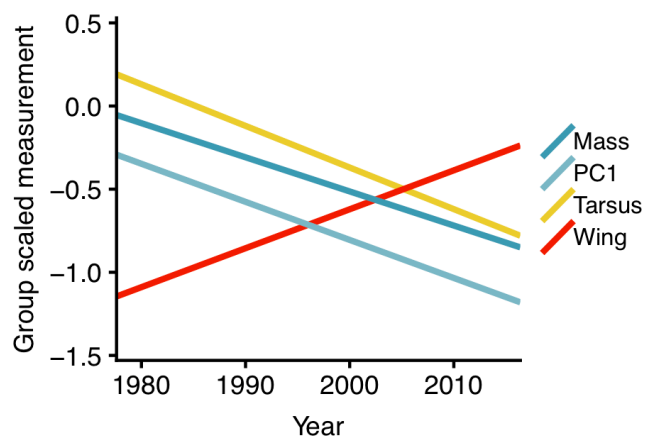

617

618

619

620

621

622

623

624

625

626

627

**Fig. 3.**

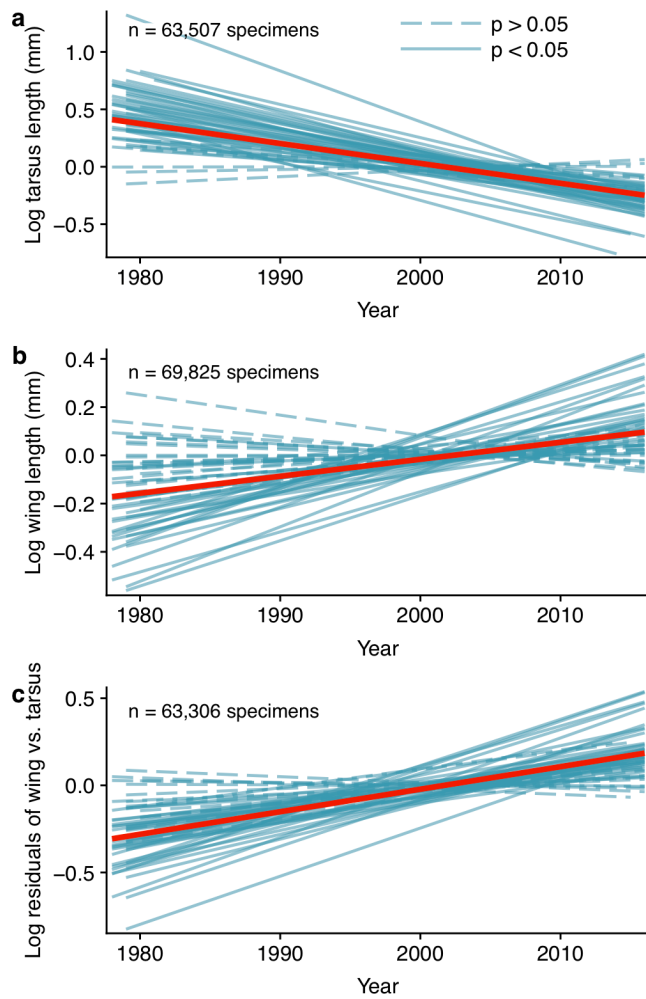

628

629

630

631

632

633

634

635

**Fig. 4.**

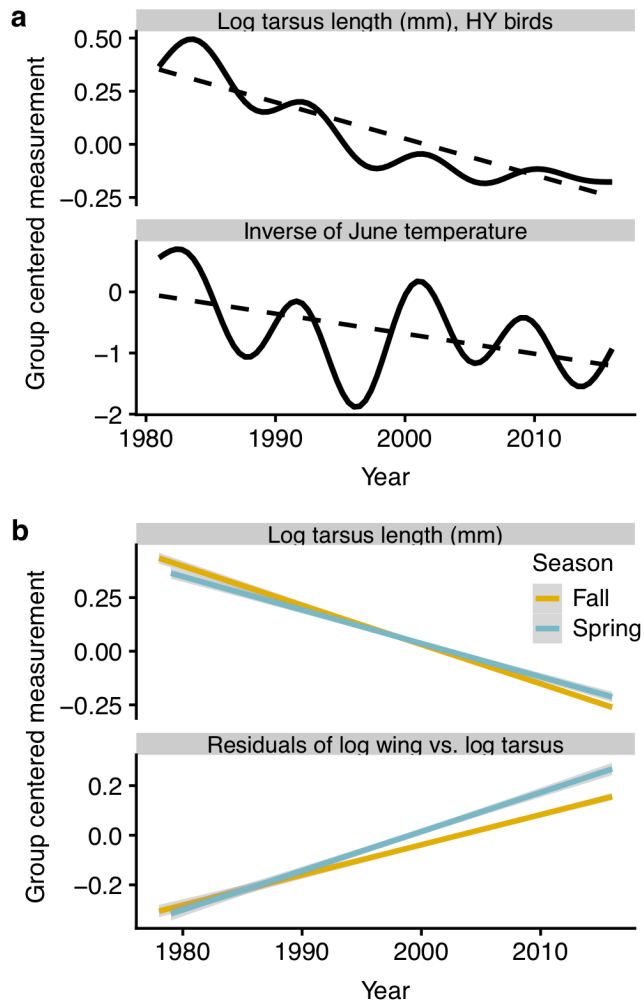

636

637

638



1  
2  
3  
4  
5  
6  
7  
8  
9  
10  
11  
12  
13  
14  
15  
16  
17  
18  
19  
20  
21  
22  
23  
24  
25  
26  
27  
28  
29  
30  
31  
32  
33  
34

## Supporting Information

|                                                                                                                                 |    |
|---------------------------------------------------------------------------------------------------------------------------------|----|
| Supplementary Methods .....                                                                                                     | 2  |
| Data Filtering .....                                                                                                            | 2  |
| Environmental Data .....                                                                                                        | 3  |
| Bayesian Mixed Modeling Framework .....                                                                                         | 4  |
| Results.....                                                                                                                    | 5  |
| Sample Sizes .....                                                                                                              | 5  |
| Ecology and Natural History .....                                                                                               | 5  |
| Body Size Declined Through Time .....                                                                                           | 6  |
| Wing Length Increased Through Time.....                                                                                         | 8  |
| Climatic and Environmental Predictors of Tarsus .....                                                                           | 8  |
| Climatic and Environmental Predictors of Wing Length .....                                                                      | 9  |
| Results Using a Bayesian Mixed Modeling Framework and Phylogenetic Correction.....                                              | 10 |
| Arrival Time.....                                                                                                               | 11 |
| Rates of Change in Tarsus Predict Rates of Change in Wing Length .....                                                          | 12 |
| Sensitivity of Results to Time Lag.....                                                                                         | 13 |
| Supplemental Figures.....                                                                                                       | 15 |
| Supplementary Figure 1. Body Size Model Results Were Robust to Subsetting of Breeding Ranges.....                               | 15 |
| Supplementary Figure 2. Body Size Decline has been Consistent Across Age and Sex Classes.....                                   | 45 |
| Supplemental Tables.....                                                                                                        | 16 |
| Supplementary Table 1. Taxonomic Sampling in the Dataset.....                                                                   | 18 |
| Supplementary Table 2. Tarsus Length has Decreased through time.....                                                            | 21 |
| Supplementary Table 3. Mass has Declined through time. ....                                                                     | 24 |
| Supplementary Table 4. PC1 Shows Decline in Body Size through Time.....                                                         | 27 |
| Supplementary Table 5. Wing Length has Increased through Time. ....                                                             | 30 |
| Supplementary Table 6. Relative Wing Length has Increased through Time. ....                                                    | 33 |
| Supplementary Table 7. Tarsus as a Function of Environmental and Climatic Variables on the Breeding and Wintering Grounds ..... | 37 |
| References and Notes.....                                                                                                       | 38 |

## 35 **Supplementary Methods**

### 36 37 *Data Filtering*

38 For the present study, the following records were removed from the dataset prior to  
39 analysis: those with no locality information or those from outside the Chicagoland, IL area  
40 (considered here to include Cook, DeKalb, DuPage, Kane, Kendall, Lake, McHenry and Will  
41 Counties, although more than 98% of specimens were from Cook County); those with no  
42 measurement data; those with no collection date recorded and those unidentified to species.  
43 Carcasses were kept in -20°C freezers prior to measurement and preparation as museum  
44 specimens. We note that freezing specimens can result in reductions of measurements,  
45 particularly mass, due to desiccation. For carcass desiccation to have biased our results, freezing  
46 times prior to measurement would needed to have increased steadily over the course of our  
47 study, and we have no indication that this has occurred in any consistent way. The vast majority  
48 of specimens came from the spring and fall migratory periods; fewer than 1,000 specimens were  
49 collected from the summer months (June and July) and were removed because they may have  
50 been nestlings or fledglings, and fewer than 300 specimens were collected from the winter  
51 months (December, January and February) and were also removed as the focus of this study is on  
52 migrants passing through Chicago.

53 To examine temporal trends in morphology across the broadest set of species, we  
54 excluded any species with fewer than 100 total specimens or with fewer than 10 specimens with  
55 complete measurement data (i.e., measurements for tarsus, wing and mass) in each period 1980 –  
56 1989, 1990 – 1999, 2000 – 2009 and 2000 – 2016. The only exceptions to these criteria were the  
57 inclusion of *Certhia americana* and *Sphyrapicus varius*, which were each represented by >2,000  
58 specimens but did not have tarsus measurements from the most recent decade.

59           Given the size of the dataset, some errors in specimen identification or data entry are  
60 inevitable, such that most species contained a handful of obviously erroneous measurements. To  
61 remove these, we filtered four measurements (tarsus, wing, bill and mass) to nullify any  
62 measurement falling outside an interquartile range of 3 for that measurement for each species  
63 (box-and-whisker plots typically identify outliers as those falling outside of a more conservative  
64 1.5 interquartile range; we used a broader range so as to remove errors while attempting to retain  
65 true outliers). This filtering procedure nullified only 326 out of 257,985 total measurements.

66  
67 *Environmental Data*

68           We calculated temperature on the breeding and wintering grounds using the NASA GISS  
69 surface temperature anomaly dataset from 1981 – 2016 (Hansen *et al.* 2010). For each species, to  
70 calculate the temperature on the breeding range, the mean June temperature anomaly of each  
71 year across the cropped breeding range was used; to calculate the temperature on the wintering  
72 range, the mean December temperature anomaly of each year across the cropped wintering range  
73 was used (S1 Fig). Temperature data were obtained through the Columbia University IRI data  
74 library (<https://iridl.ldeo.columbia.edu>). Precipitation data were obtained from 1981 – 2016 from  
75 the Global Precipitation Climatology Project, provided by NOAA/OAR/ESRL PSD, Boulder,  
76 Colorado, USA; <https://www.esrl.noaa.gov/psd/> (Adler *et al.* 2003) and used to calculate mean  
77 June and mean December precipitation across the cropped breeding and winter ranges,  
78 respectively. As a metric for primary productivity, we calculated the maximum mean  
79 Normalized Difference Vegetation Index (NDVI), obtained from the NOAA Climate Data  
80 Record (Vermote *et al.* 2014) and analyzed using Google Earth Engine (Gorelick *et al.* 2017)  
81 from 1981 – 2016. To characterize NDVI on the breeding and wintering ranges, we used the

82 maximum mean NDVI across the breeding range of each species in June and across the  
83 wintering range in December.

84

### 85 *Bayesian Mixed Modeling Framework*

86 In order to test the sensitivity of our analyses to our treatment of the phylogenetic non-  
87 independence of our data, we conducted analogous models of morphological change through  
88 time (eqn 1) and the influence of climatic and environmental variables on tarsus (eqn 2), using a  
89 Bayesian mixed model approach.

90 For all models examining changes in morphology through time (eqn 1), we conducted an  
91 analogous model but within a Bayesian framework in which we treated species identity as a  
92 random effect that incorporated a phylogenetic variance covariance matrix. We retrieved 1,000  
93 of the most likely phylogenies for our species from the posterior distribution of a global  
94 phylogeny of the birds of the world (<https://birdtree.org> (Jetz *et al.* 2012)), and calculated a 50%  
95 majority rule consensus with branch lengths, following Rubolini *et al.* (2015) (Rubolini *et al.*  
96 2015). All tips were represented in the phylogeny with genetic data.

97 Bayesian regression models analogous to the linear model structures we described above  
98 (eqn 1) were fit using “brms” (Bürkner 2017) in R (R Core Team 2018). We modeled both the  
99 phylogenetic covariance among species and included a parameter to account for species-specific  
100 effects not captured in their phylogenetic relatedness. Aside from specifying uninformative prior  
101 distributions for the independent variable parameter estimates (normal distribution, mean of 0,  
102 standard deviation of 10), brms default prior settings were used. To fit each model, four  
103 independent chains were run for 10,000 iterations with the first 1,000 discarded as burn-in;

104 convergence was assessed by examining the posterior distributions of parameter estimates, trace  
105 plots and  $\hat{R}$  values (with  $\hat{R}$  values of 1 considered to reflect convergence).

106 Similarly, a Bayesian regression model was used to assess the relationship between  
107 environmental and climatic variables and body size (eqn 2). In this model, we incorporated  
108 phylogenetic relatedness (with the phylogeny constructed as described above) and treated the  
109 data as a time series by modeling temporal auto-correlation within brms (using an autoregressive  
110 order of 1).

111 The signs and significance values (whether the significance of a parameter was above or  
112 below a threshold of  $P = 0.05$ ) of all parameters were compared to those derived from the linear  
113 models (eqns 1 – 2).

114

## 115 **Results**

116

### 117 *Sample Sizes*

118 After applying our species selection criteria, our dataset included 70,716 specimens from  
119 52 species that span 11 families and 30 genera (S1 Table). There was a mean of 1,360 specimens  
120 per species, with a range of 101-9,953 (S1 Table). Wing length was measured for 69,825 of the  
121 specimens, tarsus was measured for 63,511 specimens, and both wing length and tarsus were  
122 measured for 63,306 specimens. Skull ossification was used to specimens collected during the  
123 fall to either hatch year (HY) or after hatch year (AHY), and all spring birds were, by definition,  
124 characterized as AHY. The dataset contained 67,352 aged birds (32,873 HY; 34,479 AHY).

125

### 126 *Ecology and Natural History*

127           The only non-passerines were *Porzana carolina* (Rallidae) and *Sphyrapicus varius*  
128 (Picidae). The majority of species in the dataset are boreal forest species with breeding ranges  
129 either entirely or mainly north of Chicago (e.g., *Zonotrichia albicollis*). However, the dataset  
130 also includes some species whose breeding ranges extend further south to encompass Chicago  
131 (e.g., *Spizella pusilla*), but whose individuals must have come from north of Chicago. Breeding  
132 habitat among the species is diverse, ranging from subarctic taiga (e.g., *Catharus minimus*,  
133 *Spizelloides arborea*) to eastern broadleaf forest (e.g., *Piranga olivacea*, *Hylocichla mustelina*)  
134 to marsh habitats (e.g., *Cistothorus palustris*), edge (e.g., *Passerina cyanea*) or grasslands (e.g.  
135 *Ammodramus savannarum*). The wintering ranges and habitats are also diverse, ranging from  
136 species in which all individuals winter in South America (e.g., *Setophaga striata*, *Oporonis*  
137 *agilis*), to those species whose winter ranges include Chicago (e.g., *Junco hyemalis*, *Spizelloides*  
138 *arborea*) but in which the sampled individuals must have originated south of Chicago. The  
139 species are also diverse in diet and foraging strategy; most species are principally insectivorous  
140 in the breeding season, but some adopt a more diverse diet in the winter including granivory or  
141 frugivory. The species are also diverse in nesting biology, ranging from ground nesters to canopy  
142 nesters. Most species build open cup nests, but the dataset also includes some species that nest in  
143 cavities or crevices (*Troglodytes aedon* and *Troglodytes hiemalis*) or build covered nests (e.g.,  
144 *Seiurus aurocapilla*).

145

#### 146 *Body Size Declined Through Time*

147           All indices of body size (tarsus, mass, and PC1) declined through time. Tarsus declined  
148 significantly through time ( $P < 0.01$ ), controlling for age, sex, species effects, and species by  
149 year interactions (S2 Table). The tarsus model (eqn 1), was significantly better than the null

150 model ( $n = 58,475$ ,  $F = 73.81$ ,  $DF = 105$  and  $58,369$ ,  $P \ll 0.001$ , adjusted  $R^2 = 0.12$ ). Similarly,  
151 mass declined through time, though the relationship is only marginally significant ( $P = 0.056$ ),  
152 controlling for age, sex, species effects, and species by year interactions (S3 Table). The mass  
153 model (eqn 1) was significantly better than the null model ( $n = 52,390$ ,  $F = 97.95$ ,  $DF = 105$  and  
154  $52,284$ ,  $P \ll 0.001$ , adjusted  $R^2 = 0.16$ ).

155 The principal component analysis (PCA) of all species with data on wing length, tarsus,  
156 bill length, age, sex, and species ( $n = 48,338$ ), had four axes, the first of which (PC1) explained  
157 82% of the variance, with positive loadings on  $\log(\text{wing length})$  (0.53),  $\log(\text{tarsus})$  (0.51),  
158  $\log(\text{bill length})$  (0.44), and  $\log(\text{mass}^{1/3})$  (0.52). The second, third, and fourth axes captured the  
159 contrasts between the variables, with inconsistent signs across the loadings for the variables. PC1  
160 declined through time (indicating body size has declined through time), and this decline was  
161 significant ( $P < 0.01$ ) after controlling for age, sex, species effects and species by year  
162 interactions (S4 Table). This decline is particularly notable given the expectation that increasing  
163 temperatures should drive increasing relative bill and, to a lesser degree, tarsus length (Allen's  
164 rule (Symonds & Tattersall 2010)). The model was significantly better than the null model ( $n =$   
165  $48,338$ ,  $F = 284.8$ ,  $DF = 105$  and  $48,232$ ,  $P \ll 0.001$ , adjusted  $R^2 = 0.38$ ).

166 Given the significant decline in tarsus and PC1, and the near-significant decline in mass,  
167 our interpretation is that overall body size has declined through time. Tarsus is a better indicator  
168 of intraspecific body size in passerines than wing length (Rising & Somers 1989; Senar &  
169 Pascual 1997). Mass is expected to have higher variance given rapid fat gains and losses of  
170 migratory birds in migration (Alerstam & Lindström 1990; Morris *et al.* 1996), so it is not  
171 surprising that the mass trend was consistent with the tarsus and PC1 trends, but less statistically  
172 significant. Although estimates of body size derived from multivariate principal components

173 analyses are often desirable, we focus on tarsus as an indicator of intraspecific changes in body  
174 size, as it is not as vulnerable to fluctuations in mass (either induced by actual variations in mass  
175 that occur during migration or as a result of dehydration of specimens prior to measurement) that  
176 may impact changes in PC1.

177

### 178 *Wing Length Increased Through Time*

179 Raw wing length increased significantly through time ( $P < 0.01$ ), controlling for age, sex,  
180 species effects, and species by year interactions (S5 Table). The model was significantly better  
181 than the null model ( $n = 62,628$ ,  $F = 496$ ,  $DF = 105$  and  $62,522$ ,  $P \ll 0.001$ , adjusted  $R^2 = 0.45$ )

182 Similarly, relative wing length increased significantly through time ( $P < 0.001$ ),  
183 controlling for age, sex, year, species effects, and species by year interactions (S6 Table). The  
184 model was significantly better than the null model ( $n = 58,304$ ,  $F = 379.8$ ,  $DF = 105$  and  $58,198$ ,  
185  $P \ll 0.001$ , adjusted  $R^2 = 0.41$ ).

186 In addition to the long-term trends in relative wing length, we modeled the effect of  
187 season on relative wing length, controlling for time, season, sex, species effects, and species by  
188 year interactions. The model was significantly better than the null model ( $n = 58,304$ ,  $F = 366.6$ ,  
189  $DF = 105$  and  $58,198$ ,  $P \ll 0.001$ , adjusted  $R^2 = 0.4$ ). In this model, spring had a positive and  
190 significant ( $P < 0.05$ ) relationship with relative wing length.

191

### 192 *Climatic and Environmental Predictors of Tarsus*

193 We modeled body size as a function of climatic and environmental predictors for AHY  
194 birds from 1981-2016 (eqn 2), using both tarsus and PC1 as the index of body size. Precipitation  
195 on the breeding grounds and NDVI on the breeding grounds were highly correlated ( $R = 0.56$ ),



196 so NDVI on the breeding grounds was not included in the model. Of the variance explained by  
197 the model (amounts of variance explained are for tarsus, followed by PC1), the variables that  
198 contributed the most were sex (68%, 70%), year (22%, 24%), temperature on the breeding  
199 grounds (3%, 2%), species by year interactions (3%, 1%), and species effects (2%, 2%; this  
200 effect is small because the data were group-mean centered by species). Both tarsus and PC1 were  
201 significantly larger in males ( $P < 0.001$ ), declined through time ( $P < 0.05$ ), and was significantly  
202 negatively associated with temperature on the breeding grounds ( $P < 0.001$ ). The remaining  
203 climatic and environmental variables each explained less than 1% of the variance explained by  
204 the models. The tarsus model was significantly better than the null model ( $n = 29,702$ ,  $F = 37.41$ ,  
205  $DF = 110$  and  $29,591$ ,  $P \ll 0.001$ , adjusted  $R^2 = 0.12$ ), as was the PC1 model ( $n = 24,012$ ,  $F =$   
206  $137.5$ ,  $DF = 110$  and  $23,901$ ,  $P \ll 0.001$ , adjusted  $R^2 = 0.38$ )

207 In addition to modeling the impacts of both summer and winter variables on size, we  
208 modeled tarsus for all specimens, including both HY and AHY birds, using eqn 2, without any of  
209 the winter variables (as the HY birds had not yet lived through a winter season), and with the  
210 addition of age as a covariate. The results were qualitatively similar to the model that only  
211 included adult birds, with the most variance explained by sex (68%), year (24%), species effects  
212 (3%), temperature on the breeding grounds (2%), and species by year interactions (2%). All  
213 other variables, including age, explained less than 1% of the variance explained by the model.  
214 The model was significantly better than the null model ( $n = 57,718$ ,  $F = 69.64$ ,  $DF = 108$  and  
215  $57,609$ ,  $P \ll 0.001$ , adjusted  $R^2 = 0.11$ ).

216

217 *Climatic and Environmental Predictors of Wing Length*

218 The model of wing length of AHY birds as a function of climatic and environmental  
219 variables was (eqn 2) was significantly better than the null model ( $n = 31,987$ ,  $F = 253.6$ ,  $DF =$   
220  $110$  and  $31,876$ ,  $P \ll 0.001$ , adjusted  $R^2 = 0.46$ ). Uncorrected wing length increased  
221 significantly through time ( $P < 0.01$ ), and was significantly positively associated with winter  
222 NDVI ( $P < 0.01$ ) and winter precipitation ( $P < 0.001$ ). Despite the significant association, winter  
223 precipitation cannot explain the long-term increase in wing length, as winter precipitation has  
224 significantly declined through time ( $P < 0.001$ ) but was positively associated with wing length.  
225 Winter NDVI is positively associated with wing length, and has significantly increased through  
226 time, making it a potential driver of the long-term trend in wing length. However, winter NDVI  
227 explained less than 1% of the variance explained by the model, suggesting it is not contributing  
228 to the long-term change in wing length. More generally, with the exception of year, which  
229 explained 2% of the variance explained by the model, no environmental or climatic variables  
230 explained more than 1% of the variance explained by the model.

231 The most variance in body size-corrected wing length was explained by sex (88%), year  
232 (6%), season (4%), and species by time interactions (1%). All environmental and climatic  
233 variables, with the exception of winter temperature, were significantly associated with relative  
234 wing length ( $P < 0.05$ ), but they all explained less than 1% of the variance explained by the  
235 model.

236

### 237 *Results Using a Bayesian Mixed Modeling Framework and Phylogenetic Correction*

238 All parameter estimates converged, with  $\hat{R}$  values of 1. The relationship between year  
239 tarsus, mass, PC1, wing length, and body size-corrected wing length through time were  
240 qualitatively similar (in sign) in the Bayesian models and the linear fixed effect model results

241 (eqn 1). The only differences in statistical significance across the models was a significant  
242 relationship between mass and year in the Bayesian model, while that relationship was only  
243 marginally significant ( $P = 0.056$ ) in the fixed effects linear models.

244 The relationships between environmental and climatic factors and AHY tarsus length  
245 were also qualitatively similar in both the frequentist fixed effects model (eqn 2) and the  
246 analogous Bayesian mixed effects model. All parameter estimates had converged, with  $\hat{R}$  values  
247 of 1. All parameter signs were the same across modeling frameworks. All relationships and  
248 significance values were similar in sign and significance when the relationships between  
249 environmental and climatic variables (eqn 2) and tarsus length was modeled for all birds  
250 (including HY birds) and only summer variables, except that the association with precipitation  
251 on the breeding ground changes from marginally significant to significant.

252

### 253 *Arrival Time*

254 In order to test the influence of body size and wing length on arrival time within years,  
255 and shifts in arrival time across years, we modeled arrival time for individuals collected during  
256 their spring migration from 1979 – 2016. We filtered out any species that did not have arrival  
257 data from at least ten years, after removing any years in which specimens from that species were  
258 collected on fewer than five days. This left 26 species with data from at least ten years in which  
259 specimens of that species were collected on at least five days ( $n = 19,652$ ).

260 In order to test for the impact of body size on arrival time within years, we used the  
261 within-year collection date:  $\text{collection date} = B_0 + B_1 * \text{tarsus}_{\text{group centered}} + \text{species} + \text{species} * \text{tarsus}$   
262 (eqn 3). Similarly, to measure the effects of relative wing length on with-year arrival time, we fit  
263 eqn 3 using body size-corrected wing length, rather than tarsus.

264 In order to test for shifts in the arrival time across years, we modeled within-year  
265 collection date (again, scaled to have a mean of zero and a variance of one): collection date =  $B_0$   
266 +  $B_1$ \*year + species + species\*year (eqn 4).

267 Within-year collection date was significantly negatively associated with tarsus (i.e. larger  
268 birds arrived earlier;  $P < 0.01$ ), and the model (eqn 3) was significantly better than a null model  
269 ( $F = 1,688$ ,  $DF = 52$  and  $19,599$ ,  $P \ll 0.001$ ,  $R^2 = 0.82$ ). Within-year collection date was  
270 similarly significantly negatively associated with group centered relative wing length ( $P < 0.01$ ),  
271 and the model (eqn 3) was significantly better than a null model ( $F = 1,823$ ,  $DF = 52$  and  $19,599$ ,  
272  $P \ll 0.001$ ,  $R^2 = 0.83$ ). Across years, collection date has not changed significantly (eqn 4;  $P =$   
273  $0.31$ ).

274  
275 *Rates of Change in Tarsus Predict Rates of Change in Wing Length*

276 For each species, we modeled group-centered tarsus and body size-corrected wing length  
277 through time for each species. We retained the slope of the model for each species as well as the  
278 variance of the slope parameter estimate. In order to test the hypothesis that increases in size-  
279 corrected wing length are associated with reductions in body size, we modeled the rate of change  
280 in size-corrected wing length as a function of the rate of change in tarsus length. ( $n = 52$ ). The  
281 uncertainty in the slope estimates was treated as measurement error, and phylogenetic correlation  
282 was accounted for using the “GLSME” function in the GLSME package in R (Hansen &  
283 Bartoszek 2012); our results were sensitive to our treatment of bias.

284 Because of the variable slopes in our data, and the different levels of error across slopes  
285 and variables, we corrected for bias despite a low reliability ratio (Hansen & Bartoszek 2012).  
286 Significance of the parameter estimate was assessed based on whether the distance of the

287 parameter estimate from zero was more than twice the estimated standard error of parameter  
288 (Gelman & Hill 2009). Slope in wing length through time was negatively related to slope in  
289 tarsus through time (i.e. those species with greater rates of loss in tarsus experienced greater rates  
290 of increase in relative wing length;  $n = 52$ ). The bias-corrected GLS parameter estimate (Hansen  
291 & Bartoszek 2012) was  $-1 \times 10^{-4}$ , which was more than twice the standard error in the bias  
292 parameter estimate ( $2 \times 10^{-19}$ ), suggesting the parameter value is significantly different from zero  
293 (Gelman & Hill 2009). Importantly, this result was sensitive to our decision to correct for bias  
294 within the error structure of the measurement error; the parameter estimate, when not correcting  
295 for bias, was not significant.

296

### 297 *Sensitivity of Results to Time Lag*

298 The relationships between temperature on the breeding grounds and tarsus length was  
299 robust to our treatment of year, despite not knowing the exact age of AHY birds. Tarsus was  
300 significantly negatively related to temperature on the breeding grounds across all models. With  
301 the exception of the three-year lag, temperature on the breeding grounds was consistently  
302 responsible for explaining more of the variance explained by the model than any other  
303 environmental or climatic predictor, and in two of the three models, it explained an order of  
304 magnitude more variance than the next most important predictor. In the one treatment of time in  
305 which summer breeding temperature was not the most significant predictor (when climate and  
306 environmental data from three years earlier was used), the most important variable was  
307 precipitation on the wintering grounds. Winter precipitation could not explain the long-term  
308 trend in tarsus, as winter precipitation was positively related to tarsus, but increased through time  
309 while tarsus declined.



311

## Supplemental Figures

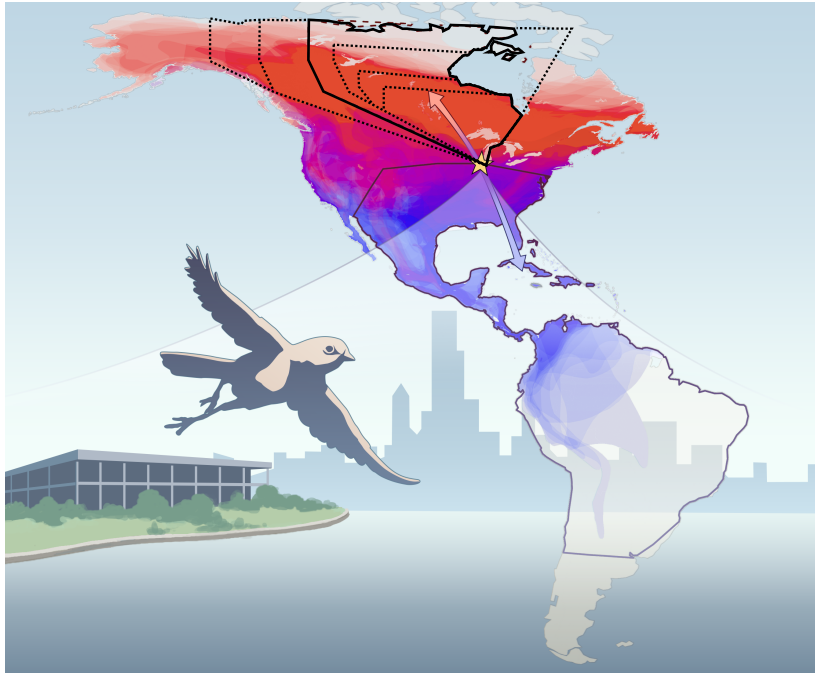

312

313

314

### ***Supplementary Figure 1. Data collection and sensitivity to Subsetting of breeding ranges.***

315

All individuals included in the study were collected after they collided with buildings in

316

Chicago, IL during fall or spring migration. The species' breeding ranges span North America

317

(individual species' breeding ranges are outlined in red) and winter ranges extend from the

318

southern United States through the Neotropics (individual species' wintering ranges are outlined

319

in blue). Likely destinations (solid and dashed lines) were determined based on known migratory

320

paths, and environmental and climatic variables were calculated for the intersection of each

321

species' range and their likely destinations; modeling results were robust to how these regions

322

were defined. We modeled the relationship between body size and environmental variables (eqn

323

2) using different subsets of the breeding ranges of each species to calculate the environmental

324

variables. The model results reported in the text are based on the region outlined with the solid

325

line. We found similar results – temperature had a significant negative relationship with body

326

size, and explained the most variance of any variable – using all areas outlined in dashed lines.

327

328

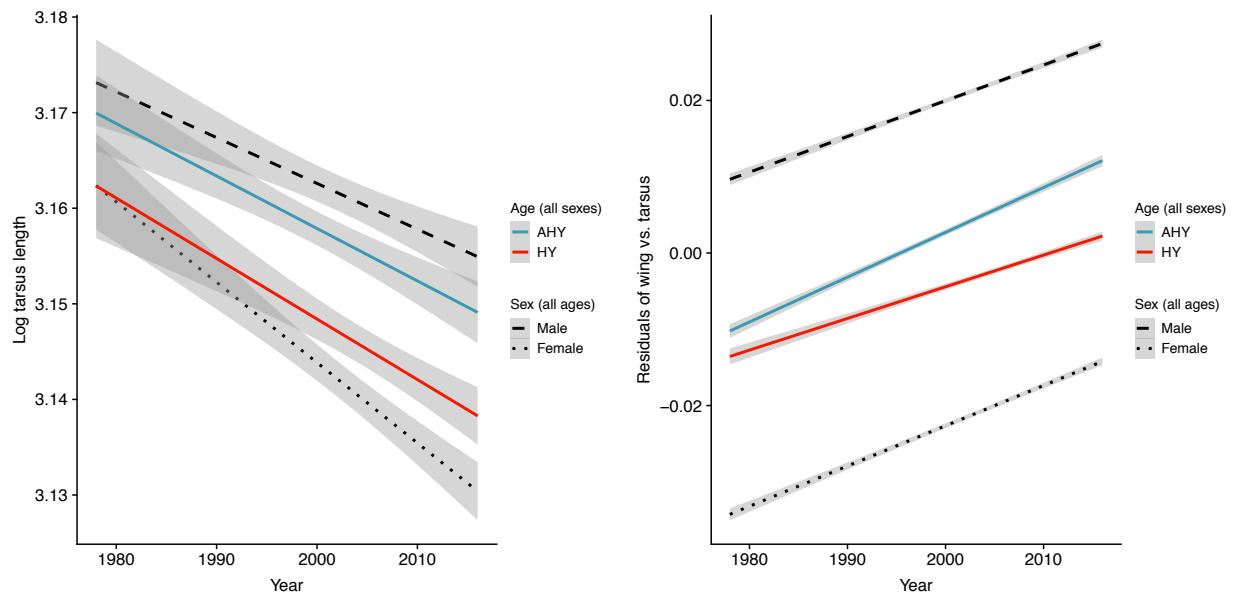

329

330

331

332

333

334

335

**Supplementary Figure 2. Body Size has Declined and Relative Wing Length has Increased Across Age and Sex Classes.** While relative wing length has increased in both age classes (right), this increase is more pronounced in adult (AHY) birds. This is consistent with selection for increased wing length during migration as a mechanism for long-term increases in wing length, rather than simple intra-annual shifts in demography.



336  
337

## Supplemental Tables

| Family        | Genus               | Species              | Number of Specimens |
|---------------|---------------------|----------------------|---------------------|
| Rallidae      | <i>Porzana</i>      | <i>carolina</i>      | 380                 |
| Picidae       | <i>Sphyrapicus</i>  | <i>varius</i>        | 2,057               |
| Regulidae     | <i>Regulus</i>      | <i>satrapa</i>       | 1,020               |
|               | <i>Regulus</i>      | <i>calendula</i>     | 412                 |
| Troglodytidae | <i>Troglodytes</i>  | <i>hiemalis</i>      | 449                 |
|               | <i>Troglodytes</i>  | <i>aedon</i>         | 101                 |
| Certhiidae    | <i>Certhia</i>      | <i>americana</i>     | 2607                |
| Mimidae       | <i>Dumetella</i>    | <i>carolinensis</i>  | 582                 |
|               | <i>Toxostoma</i>    | <i>rufum</i>         | 153                 |
| Turdidae      | <i>Catharus</i>     | <i>guttatus</i>      | 3,662               |
|               | <i>Catharus</i>     | <i>ustulatus</i>     | 2,485               |
|               | <i>Catharus</i>     | <i>minimus</i>       | 849                 |
|               | <i>Catharus</i>     | <i>fuscescens</i>    | 744                 |
|               | <i>Hylocichla</i>   | <i>mustelina</i>     | 462                 |
|               | <i>Turdus</i>       | <i>migratorius</i>   | 570                 |
| Passerellidae | <i>Ammodramus</i>   | <i>savannarum</i>    | 103                 |
|               | <i>Junco</i>        | <i>hyemalis</i>      | 6164                |
|               | <i>Melospiza</i>    | <i>melodia</i>       | 5070                |
|               | <i>Melospiza</i>    | <i>georgiana</i>     | 4897                |
|               | <i>Melospiza</i>    | <i>lincolnii</i>     | 1986                |
|               | <i>Passerculus</i>  | <i>sandwichensis</i> | 277                 |
|               | <i>Passerella</i>   | <i>iliaca</i>        | 2433                |
|               | <i>Spizella</i>     | <i>pusilla</i>       | 320                 |
|               | <i>Spizelloides</i> | <i>arborea</i>       | 1247                |
|               | <i>Zonotrichia</i>  | <i>albicollis</i>    | 9953                |
|               | <i>Zonotrichia</i>  | <i>leucophrys</i>    | 1107                |
| Icteridae     | <i>Quiscalus</i>    | <i>quiscula</i>      | 227                 |
| Parulidae     | <i>Cardellina</i>   | <i>canadensis</i>    | 250                 |
|               | <i>Cardellina</i>   | <i>pusilla</i>       | 181                 |
|               | <i>Geothlypis</i>   | <i>trichas</i>       | 1569                |
|               | <i>Geothlypis</i>   | <i>philadelphia</i>  | 427                 |
|               | <i>Mniotilta</i>    | <i>varia</i>         | 618                 |
|               | <i>Oporornis</i>    | <i>agilis</i>        | 361                 |
|               | <i>Oreothlypis</i>  | <i>peregrina</i>     | 2649                |
|               | <i>Oreothlypis</i>  | <i>ruficapilla</i>   | 1665                |

|              |                    |                       |      |
|--------------|--------------------|-----------------------|------|
|              | <i>Oreothlypis</i> | <i>celata</i>         | 232  |
|              | <i>Parkesia</i>    | <i>noveboracensis</i> | 928  |
|              | <i>Seiurus</i>     | <i>aurocapilla</i>    | 4518 |
|              | <i>Setophaga</i>   | <i>magnolia</i>       | 1220 |
|              | <i>Setophaga</i>   | <i>coronata</i>       | 892  |
|              | <i>Setophaga</i>   | <i>ruticilla</i>      | 853  |
|              | <i>Setophaga</i>   | <i>striata</i>        | 791  |
|              | <i>Setophaga</i>   | <i>palmarum</i>       | 680  |
|              | <i>Setophaga</i>   | <i>pensylvanica</i>   | 296  |
|              | <i>Setophaga</i>   | <i>castanea</i>       | 282  |
|              | <i>Setophaga</i>   | <i>virens</i>         | 215  |
|              | <i>Setophaga</i>   | <i>fusca</i>          | 199  |
|              | <i>Setophaga</i>   | <i>caerulescens</i>   | 183  |
|              | <i>Setophaga</i>   | <i>tigrina</i>        | 183  |
| Cardinalidae | <i>Passerina</i>   | <i>cyanea</i>         | 711  |
|              | <i>Pheucticus</i>  | <i>ludovicianus</i>   | 377  |
|              | <i>Piranga</i>     | <i>olivacea</i>       | 119  |

338

339

340

341

342

343

**Supplementary Table 1.** *Taxonomic Sampling in the Dataset.* After filtering the data (*Materials and Methods*), the dataset included 70,716 specimens from 52 species spanning 11 families and 30 genera.

$$\log(\text{tarsus})_{\text{group centered}} = B_0 + B_1 * \text{Year} + B_2 * \text{Age} + B_3 * \text{Sex} + \text{Species} + \text{Species} * \text{Year}$$

| Variable                         | Parameter Estimate |
|----------------------------------|--------------------|
| Intercept                        | 53.045***          |
| Year                             | -0.027***          |
| Age                              | -0.036***          |
| Sex (male)                       | 0.557***           |
| Species effects                  |                    |
| <i>Cardellina canadensis</i>     | -4.4               |
| <i>Cardellina pusilla</i>        | 15.8               |
| <i>Catharus fuscescens</i>       | -26.6              |
| <i>Catharus guttatus</i>         | -19.2              |
| <i>Catharus minimus</i>          | -22.0              |
| <i>Catharus ustulatus</i>        | -27.6              |
| <i>Certhia americana</i>         | 15.5               |
| <i>Dumetella carolinensis</i>    | -25.3              |
| <i>Geothlypis philadelphia</i>   | -5.4               |
| <i>Geothlypis trichas</i>        | -5.1               |
| <i>Hylocichla mustelina</i>      | -31.0              |
| <i>Junco hyemalis</i>            | -13.8              |
| <i>Melospiza georgiana</i>       | -18.5              |
| <i>Melospiza lincolnii</i>       | -21.3              |
| <i>Melospiza melodia</i>         | -23.9              |
| <i>Mniotilta varia</i>           | -2.6               |
| <i>Oporornis agilis</i>          | -28.1              |
| <i>Oreothlypis celata</i>        | -12.3              |
| <i>Oreothlypis peregrina</i>     | -10.1              |
| <i>Oreothlypis ruficapilla</i>   | -5.3               |
| <i>Parkesia noveboracensis</i>   | -1.0               |
| <i>Passerculus sandwichensis</i> | -36.0              |
| <i>Passerella iliaca</i>         | -18.2              |
| <i>Passerina cyanea</i>          | -9.9               |
| <i>Pheucticus ludovicianus</i>   | -40.0*             |
| <i>Piranga olivacea</i>          | -26.4              |
| <i>Porzana carolina</i>          | -56.5**            |
| <i>Quiscalus quiscula</i>        | -59.4**            |
| <i>Regulus calendula</i>         | -40.4*             |
| <i>Regulus satrapa</i>           | -30.6              |
| <i>Seiurus aurocapilla</i>       | -11.8              |
| <i>Setophaga caerulescens</i>    | -1.6               |

|                               |          |
|-------------------------------|----------|
| <i>Setophaga castanea</i>     | -6.2     |
| <i>Setophaga coronata</i>     | -13.5    |
| <i>Setophaga fusca</i>        | 39.5     |
| <i>Setophaga magnolia</i>     | -4.0     |
| <i>Setophaga palmarum</i>     | -16.5    |
| <i>Setophaga pensylvanica</i> | -18.6    |
| <i>Setophaga ruticilla</i>    | 0.3      |
| <i>Setophaga striata</i>      | -9.1     |
| <i>Setophaga tigrina</i>      | -5.0     |
| <i>Setophaga virens</i>       | -2.3     |
| <i>Sphyrapicus varius</i>     | -47.8    |
| <i>Spizella pusilla</i>       | -8.2     |
| <i>Spizelloides arborea</i>   | -36.0*   |
| <i>Toxostoma rufum</i>        | -70.1*** |
| <i>Troglodytes aedon</i>      | -20.0    |
| <i>Troglodytes hiemalis</i>   | -27.9    |
| <i>Turdus migratorius</i>     | -27.8    |
| <i>Zonotrichia albicollis</i> | -15.1    |
| <i>Zonotrichia leucophrys</i> | -23.7    |

Species by year interactions

---

|                                      |        |
|--------------------------------------|--------|
| Year: <i>Cardellina canadensis</i>   | 0.002  |
| Year: <i>Cardellina pusilla</i>      | -0.008 |
| Year: <i>Catharus fuscescens</i>     | 0.013  |
| Year: <i>Catharus guttatus</i>       | 0.01   |
| Year: <i>Catharus minimus</i>        | 0.011  |
| Year: <i>Catharus ustulatus</i>      | 0.014  |
| Year: <i>Certhia americana</i>       | -0.008 |
| Year: <i>Dumetella carolinensis</i>  | 0.013  |
| Year: <i>Geothlypis philadelphia</i> | 0.003  |
| Year: <i>Geothlypis trichas</i>      | 0.003  |
| Year: <i>Hylocichla mustelina</i>    | 0.016  |
| Year: <i>Junco hyemalis</i>          | 0.007  |
| Year: <i>Melospiza georgiana</i>     | 0.009  |
| Year: <i>Melospiza lincolnii</i>     | 0.011  |
| Year: <i>Melospiza melodia</i>       | 0.012  |
| Year: <i>Mniotilta varia</i>         | 0.001  |
| Year: <i>Oporornis agilis</i>        | 0.014  |
| Year: <i>Oreothlypis celata</i>      | 0.006  |
| Year: <i>Oreothlypis peregrina</i>   | 0.005  |
| Year: <i>Oreothlypis ruficapilla</i> | 0.003  |

|                                        |                            |
|----------------------------------------|----------------------------|
| Year: <i>Parkesia noveboracensis</i>   | 0.001                      |
| Year: <i>Passerculus sandwichensis</i> | 0.018                      |
| Year: <i>Passerella iliaca</i>         | 0.009                      |
| Year: <i>Passerina cyanea</i>          | 0.005                      |
| Year: <i>Pheucticus ludovicianus</i>   | 0.020*                     |
| Year: <i>Piranga olivacea</i>          | 0.013                      |
| Year: <i>Porzana carolina</i>          | 0.028**                    |
| Year: <i>Quiscalus quiscula</i>        | 0.030**                    |
| Year: <i>Regulus calendula</i>         | 0.020*                     |
| Year: <i>Regulus satrapa</i>           | 0.015                      |
| Year: <i>Seiurus aurocapilla</i>       | 0.006                      |
| Year: <i>Setophaga caerulescens</i>    | 0.001                      |
| Year: <i>Setophaga castanea</i>        | 0.003                      |
| Year: <i>Setophaga coronata</i>        | 0.007                      |
| Year: <i>Setophaga fusca</i>           | -0.019                     |
| Year: <i>Setophaga magnolia</i>        | 0.002                      |
| Year: <i>Setophaga palmarum</i>        | 0.008                      |
| Year: <i>Setophaga pensylvanica</i>    | 0.009                      |
| Year: <i>Setophaga ruticilla</i>       | 0.00003                    |
| Year: <i>Setophaga striata</i>         | 0.005                      |
| Year: <i>Setophaga tigrina</i>         | 0.003                      |
| Year: <i>Setophaga virens</i>          | 0.001                      |
| Year: <i>Sphyrapicus varius</i>        | 0.024                      |
| Year: <i>Spizella pusilla</i>          | 0.004                      |
| Year: <i>Spizelloides arborea</i>      | 0.018*                     |
| Year: <i>Toxostoma rufum</i>           | 0.035***                   |
| Year: <i>Troglodytes aedon</i>         | 0.01                       |
| Year: <i>Troglodytes hiemalis</i>      | 0.014                      |
| Year: <i>Turdus migratorius</i>        | 0.014                      |
| Year: <i>Zonotrichia albicollis</i>    | 0.008                      |
| Year: <i>Zonotrichia leucophrys</i>    | 0.012                      |
| Observations                           | 58,475                     |
| R <sup>2</sup>                         | 0.117                      |
| Adjusted R <sup>2</sup>                | 0.116                      |
| Residual Std. Error                    | 0.940 (df = 58,369)        |
| F Statistic                            | 73.8*** (df = 105; 58,369) |
| <hr/>                                  |                            |
| *p<0.1, **p<0.05, ***p<0.01            |                            |

344 **Supplementary Table 2.** *Tarsus Length has Decreased through Time.* All species and species by  
 345 year interaction terms are relative to the reference taxon, *Ammodramus savannorum*.  
 346

$$\log(\text{mass})_{\text{group centered}} = B_0 + B_1 * \text{Year} + B_2 * \text{Age} + B_3 * \text{Sex} + \text{Species} + \text{Species} * \text{Year}$$

| Variable                         | Parameter Estimate |
|----------------------------------|--------------------|
| Intercept                        | 39.940*            |
| Year                             | -0.020*            |
| Age                              | -0.073***          |
| Sex (male)                       | 0.782***           |
| Species Effects                  |                    |
| <i>Cardellina canadensis</i>     | -40.393*           |
| <i>Cardellina pusilla</i>        | -77.162***         |
| <i>Catharus fuscescens</i>       | -22.669            |
| <i>Catharus guttatus</i>         | -19.68             |
| <i>Catharus minimus</i>          | -0.694             |
| <i>Catharus ustulatus</i>        | -20.413            |
| <i>Certhia americana</i>         | 11.069             |
| <i>Dumetella carolinensis</i>    | -55.384**          |
| <i>Geothlypis philadelphia</i>   | -59.840***         |
| <i>Geothlypis trichas</i>        | -42.655**          |
| <i>Hylocichla mustelina</i>      | -31.793            |
| <i>Junco hyemalis</i>            | -21.893            |
| <i>Melospiza georgiana</i>       | -34.813            |
| <i>Melospiza lincolni</i>        | -30.026            |
| <i>Melospiza melodia</i>         | -25.975            |
| <i>Mniotilta varia</i>           | -39.182*           |
| <i>Oporornis agilis</i>          | -6.563             |
| <i>Oreothlypis celata</i>        | -24.88             |
| <i>Oreothlypis peregrina</i>     | -14.333            |
| <i>Oreothlypis ruficapilla</i>   | -28.319            |
| <i>Parkesia noveboracensis</i>   | -36.364*           |
| <i>Passerculus sandwichensis</i> | -41.306            |
| <i>Passerella iliaca</i>         | -29.888            |
| <i>Passerina cyanea</i>          | -27.7              |
| <i>Pheucticus ludovicianus</i>   | -37.289            |
| <i>Piranga olivacea</i>          | -26.774            |
| <i>Porzana carolina</i>          | -24.687            |
| <i>Quiscalus quiscula</i>        | -22.878            |
| <i>Regulus calendula</i>         | -24.864            |
| <i>Regulus satrapa</i>           | -4.766             |
| <i>Seiurus aurocapilla</i>       | -36.539*           |
| <i>Setophaga caerulescens</i>    | -45.315*           |

|                               |          |
|-------------------------------|----------|
| <i>Setophaga castanea</i>     | 8.706    |
| <i>Setophaga coronata</i>     | -0.49    |
| <i>Setophaga fusca</i>        | -42.113  |
| <i>Setophaga magnolia</i>     | -33.13   |
| <i>Setophaga palmarum</i>     | -13.173  |
| <i>Setophaga pensylvanica</i> | -38.026  |
| <i>Setophaga ruticilla</i>    | -40.986* |
| <i>Setophaga striata</i>      | -3.937   |
| <i>Setophaga tigrina</i>      | -4.867   |
| <i>Setophaga virens</i>       | -47.004* |
| <i>Sphyrapicus varius</i>     | -18.083  |
| <i>Spizella pusilla</i>       | -20.458  |
| <i>Spizelloides arborea</i>   | -34.536  |
| <i>Toxostoma rufum</i>        | 3.564    |
| <i>Troglodytes aedon</i>      | -20.06   |
| <i>Troglodytes hiemalis</i>   | 6.796    |
| <i>Turdus migratorius</i>     | -27.86   |
| <i>Zonotrichia albicollis</i> | -30.804  |
| <i>Zonotrichia leucophrys</i> | -38.853* |

Species by Year Interactions

---

|                                      |          |
|--------------------------------------|----------|
| Year: <i>Cardellina canadensis</i>   | 0.020*   |
| Year: <i>Cardellina pusilla</i>      | 0.039*** |
| Year: <i>Catharus fuscescens</i>     | 0.011    |
| Year: <i>Catharus guttatus</i>       | 0.01     |
| Year: <i>Catharus minimus</i>        | 0.0004   |
| Year: <i>Catharus ustulatus</i>      | 0.01     |
| Year: <i>Certhia americana</i>       | -0.005   |
| Year: <i>Dumetella carolinensis</i>  | 0.028**  |
| Year: <i>Geothlypis philadelphia</i> | 0.030*** |
| Year: <i>Geothlypis trichas</i>      | 0.021**  |
| Year: <i>Hylocichla mustelina</i>    | 0.016    |
| Year: <i>Junco hyemalis</i>          | 0.011    |
| Year: <i>Melospiza georgiana</i>     | 0.017    |
| Year: <i>Melospiza lincolnii</i>     | 0.015    |
| Year: <i>Melospiza melodia</i>       | 0.013    |
| Year: <i>Mniotilta varia</i>         | 0.020*   |
| Year: <i>Oporornis agilis</i>        | 0.003    |
| Year: <i>Oreothlypis celata</i>      | 0.013    |
| Year: <i>Oreothlypis peregrina</i>   | 0.007    |
| Year: <i>Oreothlypis ruficapilla</i> | 0.014    |

|                                        |                              |
|----------------------------------------|------------------------------|
| Year: <i>Parkesia noveboracensis</i>   | 0.018*                       |
| Year: <i>Passerculus sandwichensis</i> | 0.021*                       |
| Year: <i>Passerella iliaca</i>         | 0.015                        |
| Year: <i>Passerina cyanea</i>          | 0.014                        |
| Year: <i>Pheucticus ludovicianus</i>   | 0.019                        |
| Year: <i>Piranga olivacea</i>          | 0.013                        |
| Year: <i>Porzana carolina</i>          | 0.012                        |
| Year: <i>Quiscalus quiscula</i>        | 0.011                        |
| Year: <i>Regulus calendula</i>         | 0.012                        |
| Year: <i>Regulus satrapa</i>           | 0.003                        |
| Year: <i>Seiurus aurocapilla</i>       | 0.018*                       |
| Year: <i>Setophaga caerulescens</i>    | 0.023*                       |
| Year: <i>Setophaga castanea</i>        | -0.004                       |
| Year: <i>Setophaga coronata</i>        | 0.0003                       |
| Year: <i>Setophaga fusca</i>           | 0.021                        |
| Year: <i>Setophaga magnolia</i>        | 0.017                        |
| Year: <i>Setophaga palmarum</i>        | 0.007                        |
| Year: <i>Setophaga pensylvanica</i>    | 0.019                        |
| Year: <i>Setophaga ruticilla</i>       | 0.021*                       |
| Year: <i>Setophaga striata</i>         | 0.002                        |
| Year: <i>Setophaga tigrina</i>         | 0.003                        |
| Year: <i>Setophaga virens</i>          | 0.024*                       |
| Year: <i>Sphyrapicus varius</i>        | 0.009                        |
| Year: <i>Spizella pusilla</i>          | 0.01                         |
| Year: <i>Spizelloides arborea</i>      | 0.017                        |
| Year: <i>Toxostoma rufum</i>           | -0.002                       |
| Year: <i>Troglodytes aedon</i>         | 0.01                         |
| Year: <i>Troglodytes hiemalis</i>      | -0.003                       |
| Year: <i>Turdus migratorius</i>        | 0.014                        |
| Year: <i>Zonotrichia albicollis</i>    | 0.016                        |
| Year: <i>Zonotrichia leucophrys</i>    | 0.020*                       |
| Observations                           | 52,390                       |
| R <sup>2</sup>                         | 0.164                        |
| Adjusted R <sup>2</sup>                | 0.163                        |
| Residual Std. Error                    | 0.915 (df = 52,284)          |
| F Statistic                            | 97.954*** (df = 105; 52,284) |
| <hr/>                                  |                              |
| *p<0.1, **p<0.05, ***p<0.01            |                              |

347 **Supplementary Table 3.** Mass has Declined through Time. All species and species by year  
 348 interaction terms are relative to the reference taxon *Ammodramus savannorum*.  
 349



$$PC1_{\text{group centered}} = B_0 + B_1 * \text{Year} + B_2 * \text{Age} + B_3 * \text{Sex} + \text{Species} + \text{Species} * \text{Year}$$

| Variable                         | Parameter Estimate |
|----------------------------------|--------------------|
| Constant                         | 54.005***          |
| Year                             | -0.027***          |
| Age (HY)                         | -0.269***          |
| Sex (male)                       | 0.975***           |
| Species Effects                  |                    |
| <i>Cardellina canadensis</i>     | 32.94              |
| <i>Cardellina pusilla</i>        | 19.05              |
| <i>Catharus fuscescens</i>       | 14.42              |
| <i>Catharus guttatus</i>         | 14.52              |
| <i>Catharus minimus</i>          | 20.73              |
| <i>Catharus ustulatus</i>        | 11.84              |
| <i>Certhia americana</i>         | 7.97               |
| <i>Dumetella carolinensis</i>    | 12.54              |
| <i>Geothlypis philadelphia</i>   | -3.84              |
| <i>Geothlypis trichas</i>        | -5.03              |
| <i>Hylocichla mustelina</i>      | 11.94              |
| <i>Junco hyemalis</i>            | 7.8                |
| <i>Melospiza georgiana</i>       | 7.84               |
| <i>Melospiza lincolni</i>        | 0.75               |
| <i>Melospiza melodia</i>         | -2.45              |
| <i>Mniotilta varia</i>           | 30.28              |
| <i>Oporornis agilis</i>          | -1.45              |
| <i>Oreothlypis celata</i>        | 8.08               |
| <i>Oreothlypis peregrina</i>     | 12.22              |
| <i>Oreothlypis ruficapilla</i>   | 13.04              |
| <i>Parkesia noveboracensis</i>   | 14.62              |
| <i>Passerculus sandwichensis</i> | -16.68             |
| <i>Passerella iliaca</i>         | 13.47              |
| <i>Passerina cyanea</i>          | 17.41              |
| <i>Pheucticus ludovicianus</i>   | -11.8              |
| <i>Piranga olivacea</i>          | 6.13               |
| <i>Porzana carolina</i>          | -13.64             |
| <i>Quiscalus quiscula</i>        | -33.78             |
| <i>Regulus calendula</i>         | 30.12              |
| <i>Regulus satrapa</i>           | 28.05              |
| <i>Seiurus aurocapilla</i>       | 15.63              |
| <i>Setophaga caerulescens</i>    | 21.54              |

|                               |          |
|-------------------------------|----------|
| <i>Setophaga castanea</i>     | 31.94    |
| <i>Setophaga coronata</i>     | 32.09    |
| <i>Setophaga fusca</i>        | 2.14     |
| <i>Setophaga magnolia</i>     | 17.83    |
| <i>Setophaga palmarum</i>     | 17.79    |
| <i>Setophaga pensylvanica</i> | 9.1      |
| <i>Setophaga ruticilla</i>    | 23.84    |
| <i>Setophaga striata</i>      | 21.66    |
| <i>Setophaga tigrina</i>      | 32.91    |
| <i>Setophaga virens</i>       | 29.32    |
| <i>Sphyrapicus varius</i>     | -110.8** |
| <i>Spizella pusilla</i>       | 32.46    |
| <i>Spizelloides arborea</i>   | -3.06    |
| <i>Toxostoma rufum</i>        | -20.68   |
| <i>Troglodytes aedon</i>      | 13.15    |
| <i>Troglodytes hiemalis</i>   | 6.34     |
| <i>Turdus migratorius</i>     | -23.85   |
| <i>Zonotrichia albicollis</i> | 3.61     |
| <i>Zonotrichia leucophrys</i> | -3.78    |

Species by Year Interactions

---

|                                      |         |
|--------------------------------------|---------|
| Year: <i>Cardellina canadensis</i>   | -0.02   |
| Year: <i>Cardellina pusilla</i>      | -0.01   |
| Year: <i>Catharus fuscescens</i>     | -0.01   |
| Year: <i>Catharus guttatus</i>       | -0.01   |
| Year: <i>Catharus minimus</i>        | -0.01   |
| Year: <i>Catharus ustulatus</i>      | -0.01   |
| Year: <i>Certhia americana</i>       | -0.004  |
| Year: <i>Dumetella carolinensis</i>  | -0.01   |
| Year: <i>Geothlypis philadelphia</i> | 0.002   |
| Year: <i>Geothlypis trichas</i>      | 0.003   |
| Year: <i>Hylocichla mustelina</i>    | -0.01   |
| Year: <i>Junco hyemalis</i>          | -0.004  |
| Year: <i>Melospiza georgiana</i>     | -0.004  |
| Year: <i>Melospiza lincolnii</i>     | -0.0002 |
| Year: <i>Melospiza melodia</i>       | 0.001   |
| Year: <i>Mniotilta varia</i>         | -0.02   |
| Year: <i>Oporornis agilis</i>        | 0.001   |
| Year: <i>Oreothlypis celata</i>      | -0.004  |
| Year: <i>Oreothlypis peregrina</i>   | -0.01   |
| Year: <i>Oreothlypis ruficapilla</i> | -0.01   |

---

|                                        |                          |
|----------------------------------------|--------------------------|
| Year: <i>Parkesia noveboracensis</i>   | -0.01                    |
| Year: <i>Passerculus sandwichensis</i> | 0.01                     |
| Year: <i>Passerella iliaca</i>         | -0.01                    |
| Year: <i>Passerina cyanea</i>          | -0.01                    |
| Year: <i>Pheucticus ludovicianus</i>   | 0.01                     |
| Year: <i>Piranga olivacea</i>          | -0.003                   |
| Year: <i>Porzana carolina</i>          | 0.01                     |
| Year: <i>Quiscalus quiscula</i>        | 0.02                     |
| Year: <i>Regulus calendula</i>         | -0.02                    |
| Year: <i>Regulus satrapa</i>           | -0.01                    |
| Year: <i>Seiurus aurocapilla</i>       | -0.01                    |
| Year: <i>Setophaga caerulescens</i>    | -0.01                    |
| Year: <i>Setophaga castanea</i>        | -0.02                    |
| Year: <i>Setophaga coronata</i>        | -0.02                    |
| Year: <i>Setophaga fusca</i>           | -0.001                   |
| Year: <i>Setophaga magnolia</i>        | -0.01                    |
| Year: <i>Setophaga palmarum</i>        | -0.01                    |
| Year: <i>Setophaga pensylvanica</i>    | -0.004                   |
| Year: <i>Setophaga ruticilla</i>       | -0.01                    |
| Year: <i>Setophaga striata</i>         | -0.01                    |
| Year: <i>Setophaga tigrina</i>         | -0.02                    |
| Year: <i>Setophaga virens</i>          | -0.01                    |
| Year: <i>Sphyrapicus varius</i>        | 0.06**                   |
| Year: <i>Spizella pusilla</i>          | -0.02                    |
| Year: <i>Spizelloides arborea</i>      | 0.002                    |
| Year: <i>Toxostoma rufum</i>           | 0.01                     |
| Year: <i>Troglodytes aedon</i>         | -0.01                    |
| Year: <i>Troglodytes hiemalis</i>      | -0.003                   |
| Year: <i>Turdus migratorius</i>        | 0.01                     |
| Year: <i>Zonotrichia albicollis</i>    | -0.002                   |
| Year: <i>Zonotrichia leucophrys</i>    | 0.002                    |
| Observations                           | 48,338                   |
| R <sup>2</sup>                         | 0.383                    |
| Adjusted R <sup>2</sup>                | 0.381                    |
| Residual Std. Error                    | 0.786 (df = 48,232)      |
| F Statistic                            | 284.778*** (df = 48,232) |
| <hr/>                                  |                          |
| *p<0.1, **p<0.05, ***p<0.01            |                          |

350 **Supplementary Table 4. PCI Shows Decline in Body Size through Time.** All species and species  
 351 by year interaction terms are relative to the reference taxon *Ammodramus savannorum*.  
 352

$$\log(\text{Wing Length})_{\text{group centered}} = B_0 + B_1 * \text{Year} + B_2 * \text{Age} + B_3 * \text{Sex} + \text{Species} + \text{Species} * \text{Year}$$

| Variable                         | Parameter Estimate |
|----------------------------------|--------------------|
| Intercept                        | -48.117***         |
| Year                             | 0.024***           |
| Age                              | -0.201***          |
| Sex (male)                       | 1.323***           |
| Species Effects                  |                    |
| <i>Cardellina canadensis</i>     | 30.0*              |
| <i>Cardellina pusilla</i>        | 16.0               |
| <i>Catharus fuscescens</i>       | 45.0***            |
| <i>Catharus guttatus</i>         | 38.9**             |
| <i>Catharus minimus</i>          | 44.2***            |
| <i>Catharus ustulatus</i>        | 48.3***            |
| <i>Certhia americana</i>         | 12.9               |
| <i>Dumetella carolinensis</i>    | 44.2***            |
| <i>Geothlypis philadelphia</i>   | 31.4*              |
| <i>Geothlypis trichas</i>        | 16.4               |
| <i>Hylocichla mustelina</i>      | 63.6***            |
| <i>Junco hyemalis</i>            | 28.9*              |
| <i>Melospiza georgiana</i>       | 12.5               |
| <i>Melospiza lincolnii</i>       | 4.6                |
| <i>Melospiza melodia</i>         | 12.7               |
| <i>Mniotilta varia</i>           | 33.7*              |
| <i>Oporornis agilis</i>          | 18.1               |
| <i>Oreothlypis celata</i>        | 55.0***            |
| <i>Oreothlypis peregrina</i>     | 26.1*              |
| <i>Oreothlypis ruficapilla</i>   | 19.9               |
| <i>Parkesia noveboracensis</i>   | 26.4               |
| <i>Passerculus sandwichensis</i> | 8.7                |
| <i>Passerella iliaca</i>         | 37.9**             |
| <i>Passerina cyanea</i>          | 27.4*              |
| <i>Pheucticus ludovicianus</i>   | 29.8*              |
| <i>Piranga olivacea</i>          | 51.0***            |
| <i>Porzana carolina</i>          | 36.3**             |
| <i>Quiscalus quiscula</i>        | 41.6**             |
| <i>Regulus calendula</i>         | 43.4**             |
| <i>Regulus satrapa</i>           | 19.7               |
| <i>Seiurus aurocapilla</i>       | 25.9*              |
| <i>Setophaga caerulescens</i>    | 29.8               |

|                               |         |
|-------------------------------|---------|
| <i>Setophaga castanea</i>     | 57.6*** |
| <i>Setophaga coronata</i>     | 34.2**  |
| <i>Setophaga fusca</i>        | 16.6    |
| <i>Setophaga magnolia</i>     | 20.0    |
| <i>Setophaga palmarum</i>     | 27.1    |
| <i>Setophaga pensylvanica</i> | 27.7    |
| <i>Setophaga ruticilla</i>    | 50.2*** |
| <i>Setophaga striata</i>      | 34.3**  |
| <i>Setophaga tigrina</i>      | 30.2    |
| <i>Setophaga virens</i>       | 31.0    |
| <i>Sphyrapicus varius</i>     | 74.6*** |
| <i>Spizella pusilla</i>       | 25.9    |
| <i>Spizelloides arborea</i>   | 21.6    |
| <i>Toxostoma rufum</i>        | 54.1*** |
| <i>Troglodytes aedon</i>      | -5.2    |
| <i>Troglodytes hiemalis</i>   | 37.0**  |
| <i>Turdus migratorius</i>     | 19.7    |
| <i>Zonotrichia albicollis</i> | 22.1    |
| <i>Zonotrichia leucophrys</i> | 16.1    |

Species by Year Interactions

---

|                                      |           |
|--------------------------------------|-----------|
| Year: <i>Cardellina canadensis</i>   | -0.015*   |
| Year: <i>Cardellina pusilla</i>      | -0.008    |
| Year: <i>Catharus fuscescens</i>     | -0.023*** |
| Year: <i>Catharus guttatus</i>       | -0.019**  |
| Year: <i>Catharus minimus</i>        | -0.022*** |
| Year: <i>Catharus ustulatus</i>      | -0.024*** |
| Year: <i>Certhia americana</i>       | -0.006    |
| Year: <i>Dumetella carolinensis</i>  | -0.022*** |
| Year: <i>Geothlypis philadelphia</i> | -0.016*   |
| Year: <i>Geothlypis trichas</i>      | -0.008    |
| Year: <i>Hylocichla mustelina</i>    | -0.032*** |
| Year: <i>Junco hyemalis</i>          | -0.014*   |
| Year: <i>Melospiza georgiana</i>     | -0.006    |
| Year: <i>Melospiza lincolni</i>      | -0.002    |
| Year: <i>Melospiza melodia</i>       | -0.006    |
| Year: <i>Mniotilta varia</i>         | -0.017*   |
| Year: <i>Oporornis agilis</i>        | -0.009    |
| Year: <i>Oreothlypis celata</i>      | -0.027*** |
| Year: <i>Oreothlypis peregrina</i>   | -0.013*   |
| Year: <i>Oreothlypis ruficapilla</i> | -0.01     |

|                                        |                               |
|----------------------------------------|-------------------------------|
| Year: <i>Parkesia noveboracensis</i>   | -0.013                        |
| Year: <i>Passerculus sandwichensis</i> | -0.004                        |
| Year: <i>Passerella iliaca</i>         | -0.019**                      |
| Year: <i>Passerina cyanea</i>          | -0.014*                       |
| Year: <i>Pheucticus ludovicianus</i>   | -0.015*                       |
| Year: <i>Piranga olivacea</i>          | -0.026***                     |
| Year: <i>Porzana carolina</i>          | -0.018**                      |
| Year: <i>Quiscalus quiscula</i>        | -0.021**                      |
| Year: <i>Regulus calendula</i>         | -0.022**                      |
| Year: <i>Regulus satrapa</i>           | -0.01                         |
| Year: <i>Seiurus aurocapilla</i>       | -0.013*                       |
| Year: <i>Setophaga caerulescens</i>    | -0.015                        |
| Year: <i>Setophaga castanea</i>        | -0.029***                     |
| Year: <i>Setophaga coronata</i>        | -0.017**                      |
| Year: <i>Setophaga fusca</i>           | -0.008                        |
| Year: <i>Setophaga magnolia</i>        | -0.01                         |
| Year: <i>Setophaga palmarum</i>        | -0.014                        |
| Year: <i>Setophaga pensylvanica</i>    | -0.014                        |
| Year: <i>Setophaga ruticilla</i>       | -0.025***                     |
| Year: <i>Setophaga striata</i>         | -0.017**                      |
| Year: <i>Setophaga tigrina</i>         | -0.015                        |
| Year: <i>Setophaga virens</i>          | -0.015                        |
| Year: <i>Sphyrapicus varius</i>        | -0.037***                     |
| Year: <i>Spizella pusilla</i>          | -0.013                        |
| Year: <i>Spizelloides arborea</i>      | -0.011                        |
| Year: <i>Toxostoma rufum</i>           | -0.027***                     |
| Year: <i>Troglodytes aedon</i>         | 0.003                         |
| Year: <i>Troglodytes hiemalis</i>      | -0.018**                      |
| Year: <i>Turdus migratorius</i>        | -0.01                         |
| Year: <i>Zonotrichia albicollis</i>    | -0.011                        |
| Year: <i>Zonotrichia leucophrys</i>    | -0.008                        |
| Observations                           | 62,628                        |
| R <sup>2</sup>                         | 0.454                         |
| Adjusted R <sup>2</sup>                | 0.454                         |
| Residual Std. Error                    | 0.739 (df = 62,522)           |
| F Statistic                            | 496.017*** (df = 105; 62,522) |
| <hr/>                                  |                               |
| *p<0.1, **p<0.05, ***p<0.01            |                               |

353 **Supplementary Table 5.** *Wing Length has Increased through Time.* All species and species by  
354 year interaction terms are relative to the reference taxon *Ammodramus savannorum*.  
355

$$\text{Relative Wing Length}_{\text{group centered}} = B_0 + B_1 * \text{Year} + B_2 * \text{Age} + B_3 * \text{Sex} + \text{Species} + \text{Species} * \text{Year}$$

| Variable                         | Parameter Estimate |
|----------------------------------|--------------------|
| Intercept                        | -57.594***         |
| Year                             | 0.029***           |
| Age (hatch year)                 | -0.203***          |
| Sex (male)                       | 1.224***           |
| Species Effects                  |                    |
| <i>Cardellina canadensis</i>     | 31.7               |
| <i>Cardellina pusilla</i>        | 25.9               |
| <i>Catharus fuscescens</i>       | 40.1**             |
| <i>Catharus guttatus</i>         | 36.1**             |
| <i>Catharus minimus</i>          | 39.5**             |
| <i>Catharus ustulatus</i>        | 46.5***            |
| <i>Certhia americana</i>         | 37.1               |
| <i>Dumetella carolinensis</i>    | 50.2***            |
| <i>Geothlypis philadelphia</i>   | 27.8               |
| <i>Geothlypis trichas</i>        | 14.7               |
| <i>Hylocichla mustelina</i>      | 64.3***            |
| <i>Junco hyemalis</i>            | 24.5               |
| <i>Melospiza georgiana</i>       | 6.9                |
| <i>Melospiza lincolni</i>        | -1.6               |
| <i>Melospiza melodia</i>         | 12.4               |
| <i>Mniotilta varia</i>           | 40.8**             |
| <i>Oporornis agilis</i>          | 22.9               |
| <i>Oreothlypis celata</i>        | 50.0**             |
| <i>Oreothlypis peregrina</i>     | 24.5               |
| <i>Oreothlypis ruficapilla</i>   | 20.5               |
| <i>Parkesia noveboracensis</i>   | 19.5               |
| <i>Passerculus sandwichensis</i> | 5.3                |
| <i>Passerella iliaca</i>         | 33.5**             |
| <i>Passerina cyanea</i>          | 30.3*              |
| <i>Pheucticus ludovicianus</i>   | 35.2*              |
| <i>Piranga olivacea</i>          | 57.5***            |
| <i>Porzana carolina</i>          | 52.2***            |
| <i>Quiscalus quiscula</i>        | 74.4***            |
| <i>Regulus calendula</i>         | 46.7**             |
| <i>Regulus satrapa</i>           | 24.4               |
| <i>Seiurus aurocapilla</i>       | 29.3*              |
| <i>Setophaga caerulescens</i>    | 31.7               |

|                               |         |
|-------------------------------|---------|
| <i>Setophaga castanea</i>     | 48.4**  |
| <i>Setophaga coronata</i>     | 24.8    |
| <i>Setophaga fusca</i>        | 4.5     |
| <i>Setophaga magnolia</i>     | 17.8    |
| <i>Setophaga palmarum</i>     | 27.5    |
| <i>Setophaga pensylvanica</i> | 21.9    |
| <i>Setophaga ruticilla</i>    | 48.0*** |
| <i>Setophaga striata</i>      | 28.2    |
| <i>Setophaga tigrina</i>      | 24.0    |
| <i>Setophaga virens</i>       | 30.7    |
| <i>Sphyrapicus varius</i>     | 70.7*   |
| <i>Spizella pusilla</i>       | 23.7    |
| <i>Spizelloides arborea</i>   | 23.4    |
| <i>Toxostoma rufum</i>        | 66.2*** |
| <i>Troglodytes aedon</i>      | -3.7    |
| <i>Troglodytes hiemalis</i>   | 35.5*   |
| <i>Turdus migratorius</i>     | 18.8    |
| <i>Zonotrichia albicollis</i> | 11.4    |
| <i>Zonotrichia leucophrys</i> | 10.0    |

Species by Year Interactions

---

|                                      |           |
|--------------------------------------|-----------|
| Year: <i>Cardellina canadensis</i>   | -0.016    |
| Year: <i>Cardellina pusilla</i>      | -0.013    |
| Year: <i>Catharus fuscescens</i>     | -0.020**  |
| Year: <i>Catharus guttatus</i>       | -0.018**  |
| Year: <i>Catharus minimus</i>        | -0.020**  |
| Year: <i>Catharus ustulatus</i>      | -0.023*** |
| Year: <i>Certhia americana</i>       | -0.018    |
| Year: <i>Dumetella carolinensis</i>  | -0.025*** |
| Year: <i>Geothlypis philadelphia</i> | -0.014    |
| Year: <i>Geothlypis trichas</i>      | -0.007    |
| Year: <i>Hylocichla mustelina</i>    | -0.032*** |
| Year: <i>Junco hyemalis</i>          | -0.012    |
| Year: <i>Melospiza georgiana</i>     | -0.003    |
| Year: <i>Melospiza lincolnii</i>     | 0.001     |
| Year: <i>Melospiza melodia</i>       | -0.006    |
| Year: <i>Mniotilta varia</i>         | -0.020**  |
| Year: <i>Oporornis agilis</i>        | -0.011    |
| Year: <i>Oreothlypis celata</i>      | -0.025**  |
| Year: <i>Oreothlypis peregrina</i>   | -0.012    |
| Year: <i>Oreothlypis ruficapilla</i> | -0.01     |



|                                        |                               |
|----------------------------------------|-------------------------------|
| Year: <i>Parkesia noveboracensis</i>   | -0.01                         |
| Year: <i>Passerculus sandwichensis</i> | -0.003                        |
| Year: <i>Passerella iliaca</i>         | -0.017**                      |
| Year: <i>Passerina cyanea</i>          | -0.015*                       |
| Year: <i>Pheucticus ludovicianus</i>   | -0.018*                       |
| Year: <i>Piranga olivacea</i>          | -0.029***                     |
| Year: <i>Porzana carolina</i>          | -0.026***                     |
| Year: <i>Quiscalus quiscula</i>        | -0.037***                     |
| Year: <i>Regulus calendula</i>         | -0.023**                      |
| Year: <i>Regulus satrapa</i>           | -0.012                        |
| Year: <i>Seiurus aurocapilla</i>       | -0.015*                       |
| Year: <i>Setophaga caerulescens</i>    | -0.016                        |
| Year: <i>Setophaga castanea</i>        | -0.024**                      |
| Year: <i>Setophaga coronata</i>        | -0.012                        |
| Year: <i>Setophaga fusca</i>           | -0.002                        |
| Year: <i>Setophaga magnolia</i>        | -0.009                        |
| Year: <i>Setophaga palmarum</i>        | -0.014                        |
| Year: <i>Setophaga pensylvanica</i>    | -0.011                        |
| Year: <i>Setophaga ruticilla</i>       | -0.024***                     |
| Year: <i>Setophaga striata</i>         | -0.014                        |
| Year: <i>Setophaga tigrina</i>         | -0.012                        |
| Year: <i>Setophaga virens</i>          | -0.015                        |
| Year: <i>Sphyrapicus varius</i>        | -0.035*                       |
| Year: <i>Spizella pusilla</i>          | -0.012                        |
| Year: <i>Spizelloides arborea</i>      | -0.012                        |
| Year: <i>Toxostoma rufum</i>           | -0.033***                     |
| Year: <i>Troglodytes aedon</i>         | 0.002                         |
| Year: <i>Troglodytes hiemalis</i>      | -0.018*                       |
| Year: <i>Turdus migratorius</i>        | -0.009                        |
| Year: <i>Zonotrichia albicollis</i>    | -0.006                        |
| Year: <i>Zonotrichia leucophrys</i>    | -0.005                        |
| Observations                           | 58,304                        |
| R <sup>2</sup>                         | 0.407                         |
| Adjusted R <sup>2</sup>                | 0.406                         |
| Residual Std. Error                    | 0.771 (df = 58,198)           |
| F Statistic                            | 379.777*** (df = 105; 58,198) |
| <hr/>                                  |                               |
| *p<0.1, **p<0.05, ***p<0.01            |                               |

356 **Supplementary Table 6.** Relative Wing Length has Increased through Time. All species and  
357 species by year interaction terms are relative to the reference taxon *Ammodramus savannorum*.  
358

$$\text{Tarsus}_{\text{adults, group centered}} = B_0 + B_1 * \text{Year} + B_2 * \text{Breeding Precipitation} + B_3 * \text{Breeding Temperature} + B_4 * \text{Wintering Precipitation} + B_5 * \text{Wintering Temperature} + B_6 * \text{Wintering NDVI} + B_7 * \text{Sex} + B_8 * \text{Season} + \text{Species} + \text{Species} * \text{Year}$$

| Variable                         | Parameter Estimate |
|----------------------------------|--------------------|
| Intercept                        | -0.493***          |
| Year                             | -0.285**           |
| Breeding Temperature             | -0.045***          |
| Breeding Precipitation           | -0.006             |
| Wintering Temperature            | 0.042***           |
| Wintering Precipitation          | -0.043***          |
| Wintering NDVI                   | 0.016**            |
| Sex (male)                       | 0.581***           |
| Season (spring)                  | 0.011              |
| Species Effects                  |                    |
| <i>Cardellina canadensis</i>     | 0.3**              |
| <i>Cardellina pusilla</i>        | 0.1                |
| <i>Catharus fuscescens</i>       | 0.3**              |
| <i>Catharus guttatus</i>         | 0.2*               |
| <i>Catharus minimus</i>          | 0.3**              |
| <i>Catharus ustulatus</i>        | 0.3**              |
| <i>Certhia americana</i>         | 0.1                |
| <i>Dumetella carolinensis</i>    | 0.1                |
| <i>Geothlypis philadelphia</i>   | 0.1                |
| <i>Geothlypis trichas</i>        | 0.1                |
| <i>Hylocichla mustelina</i>      | 0.2                |
| <i>Junco hyemalis</i>            | 0.1                |
| <i>Melospiza georgiana</i>       | 0.1                |
| <i>Melospiza lincolnii</i>       | 0.2                |
| <i>Melospiza melodia</i>         | 0.1                |
| <i>Mniotilta varia</i>           | 0.5***             |
| <i>Oporornis agilis</i>          | 0.3*               |
| <i>Oreothlypis celata</i>        | 0.2                |
| <i>Oreothlypis peregrina</i>     | 0.2*               |
| <i>Oreothlypis ruficapilla</i>   | 0.2                |
| <i>Parkesia noveboracensis</i>   | 0.2*               |
| <i>Passerculus sandwichensis</i> | 0.1                |
| <i>Passerella iliaca</i>         | 0.2*               |
| <i>Passerina cyanea</i>          | -0.03              |
| <i>Pheucticus ludovicianus</i>   | 0.1                |

|                               |        |
|-------------------------------|--------|
| <i>Piranga olivacea</i>       | 0.2    |
| <i>Porzana carolina</i>       | 0.2    |
| <i>Quiscalus quiscula</i>     | 0.3*   |
| <i>Regulus calendula</i>      | 0.1    |
| <i>Regulus satrapa</i>        | 0.3**  |
| <i>Seiurus aurocapilla</i>    | 0.2*   |
| <i>Setophaga caerulescens</i> | 0.3    |
| <i>Setophaga castanea</i>     | 0.4**  |
| <i>Setophaga coronata</i>     | 0.2    |
| <i>Setophaga fusca</i>        | 0.6*** |
| <i>Setophaga magnolia</i>     | 0.3**  |
| <i>Setophaga palmarum</i>     | 0.2    |
| <i>Setophaga pensylvanica</i> | 0.3**  |
| <i>Setophaga ruticilla</i>    | 0.4*** |
| <i>Setophaga striata</i>      | 0.3*   |
| <i>Setophaga tigrina</i>      | 0.2    |
| <i>Setophaga virens</i>       | 0.5*** |
| <i>Sphyrapicus varius</i>     | 0.02   |
| <i>Spizella pusilla</i>       | -0.05  |
| <i>Spizelloides arborea</i>   | 0.3**  |
| <i>Toxostoma rufum</i>        | 0.1    |
| <i>Troglodytes aedon</i>      | 0.2    |
| <i>Troglodytes hiemalis</i>   | 0.3*   |
| <i>Turdus migratorius</i>     | 0.2    |
| <i>Zonotrichia albicollis</i> | 0.3**  |
| <i>Zonotrichia leucophrys</i> | 0.2*   |

Species by Year Interactions

---

|                                      |        |
|--------------------------------------|--------|
| Year: <i>Cardellina canadensis</i>   | 0.027  |
| Year: <i>Cardellina pusilla</i>      | 0.029  |
| Year: <i>Catharus fuscescens</i>     | 0.113  |
| Year: <i>Catharus guttatus</i>       | 0.112  |
| Year: <i>Catharus minimus</i>        | 0.141  |
| Year: <i>Catharus ustulatus</i>      | 0.221* |
| Year: <i>Certhia americana</i>       | 0.055  |
| Year: <i>Dumetella carolinensis</i>  | 0.077  |
| Year: <i>Geothlypis philadelphia</i> | 0.018  |
| Year: <i>Geothlypis trichas</i>      | 0.026  |
| Year: <i>Hylocichla mustelina</i>    | 0.15   |
| Year: <i>Junco hyemalis</i>          | 0.108  |
| Year: <i>Melospiza georgiana</i>     | 0.079  |

|                                        |         |
|----------------------------------------|---------|
| Year: <i>Melospiza lincolnii</i>       | 0.093   |
| Year: <i>Melospiza melodia</i>         | 0.13    |
| Year: <i>Mniotilta varia</i>           | -0.097  |
| Year: <i>Oporornis agilis</i>          | 0.064   |
| Year: <i>Oreothlypis celata</i>        | 0.042   |
| Year: <i>Oreothlypis peregrina</i>     | 0.041   |
| Year: <i>Oreothlypis ruficapilla</i>   | 0.112   |
| Year: <i>Parkesia noveboracensis</i>   | -0.008  |
| Year: <i>Passerculus sandwichensis</i> | 0.12    |
| Year: <i>Passerella iliaca</i>         | 0.135   |
| Year: <i>Passerina cyanea</i>          | 0.056   |
| Year: <i>Pheucticus ludovicianus</i>   | 0.178   |
| Year: <i>Piranga olivacea</i>          | 0.211   |
| Year: <i>Porzana carolina</i>          | 0.389** |
| Year: <i>Quiscalus quiscula</i>        | 0.354** |
| Year: <i>Regulus calendula</i>         | 0.258*  |
| Year: <i>Regulus satrapa</i>           | 0.175   |
| Year: <i>Seiurus aurocapilla</i>       | 0.057   |
| Year: <i>Setophaga caerulescens</i>    | 0.12    |
| Year: <i>Setophaga castanea</i>        | 0.099   |
| Year: <i>Setophaga coronata</i>        | 0.052   |
| Year: <i>Setophaga fusca</i>           | -0.197  |
| Year: <i>Setophaga magnolia</i>        | 0.035   |
| Year: <i>Setophaga palmarum</i>        | -0.058  |
| Year: <i>Setophaga pensylvanica</i>    | 0.049   |
| Year: <i>Setophaga ruticilla</i>       | -0.042  |
| Year: <i>Setophaga striata</i>         | 0.041   |
| Year: <i>Setophaga tigrina</i>         | 0.172   |
| Year: <i>Setophaga virens</i>          | -0.168  |
| Year: <i>Sphyrapicus varius</i>        | 0.112   |
| Year: <i>Spizella pusilla</i>          | 0.019   |
| Year: <i>Spizelloides arborea</i>      | 0.213*  |
| Year: <i>Toxostoma rufum</i>           | 0.349** |
| Year: <i>Troglodytes aedon</i>         | 0.154   |
| Year: <i>Troglodytes hiemalis</i>      | 0.13    |
| Year: <i>Turdus migratorius</i>        | 0.142   |
| Year: <i>Zonotrichia albicollis</i>    | 0.101   |
| Year: <i>Zonotrichia leucophrys</i>    | 0.119   |
| Observations                           | 29,702  |
| R <sup>2</sup>                         | 0.122   |

|                             |                              |
|-----------------------------|------------------------------|
| Adjusted R <sup>2</sup>     | 0.119                        |
| Residual Std. Error         | 0.938 (df = 29,591)          |
| F Statistic                 | 37.409*** (df = 110; 29,591) |
| <hr/>                       |                              |
| *p<0.1; **p<0.05; ***p<0.01 |                              |
| <hr/>                       |                              |

359

360

361

362

363

**Supplementary Table 7.** *Tarsus as a Function of Environmental and Climatic Variables on the Breeding and Wintering Grounds.* All species and species by year interaction terms are relative to the reference taxon *Ammodramus savannorum*.

364  
365  
366  
367  
368  
369  
370  
371  
372  
373  
374  
375  
376  
377  
378  
379  
380  
381  
382  
383  
384  
385  
386  
387  
388  
389  
390  
391  
392  
393  
394  
395  
396  
397  
398  
399  
400  
401  
402  
403

## References and Notes

- Adler, R.F., Huffman, G.J., Chang, A., Ferraro, R., Xie, P.-P., Janowiak, J., *et al.* (2003). The Version-2 Global Precipitation Climatology Project (GPCP) Monthly Precipitation Analysis (1979–Present). *J. Hydrometeorol.*, 4, 1147–1167.
- Alerstam, T. & Lindström, Å. (1990). Optimal Bird Migration: The Relative Importance of Time, Energy, and Safety. In: *Bird Migration*. pp. 331–351.
- Bürkner, P.-C. (2017). brms : An R Package for Bayesian Multilevel Models Using Stan. *J. Stat. Softw.*, 80, 1–28.
- Gelman, A. & Hill, J. (2009). *Data Analysis Using Regression and Multilevel/Hierarchical Models*. Book. Cambridge University Press, New York, NY.
- Gorelick, N., Hancher, M., Dixon, M., Ilyushchenko, S., Thau, D. & Moore, R. (2017). Google Earth Engine: Planetary-scale geospatial analysis for everyone. *Remote Sens. Environ.*, 202, 18–27.
- Hansen, J., Ruedy, R., Sato, M. & Lo, K. (2010). Global surface temperature change. *Rev. Geophys.*, 48, RG4004.
- Hansen, T.F. & Bartoszek, K. (2012). Interpreting the evolutionary regression: The interplay between observational and biological errors in phylogenetic comparative studies. *Syst. Biol.*, 61, 413–425.
- Jetz, W., Thomas, G.H., Hartmann, K. & Mooers, A.O. (2012). The global diversity of birds in space and time. *Nature*, 491, 444–448.
- Morris, S.R., Holmes, D.W. & Richmond, M.E. (1996). A ten-year study of the stopover patterns of migratory passerines during fall migration on Appledore Island, Maine. *Condor*, 98, 395–409.
- R Core Team. (2018). R: A language and environment for statistical computing.
- Rising, J.D. & Somers, K.M. (1989). The measurement of overall body size in birds. *Auk*, 106, 666–674.
- Rubolini, D., Liker, A., Garamszegi, L.Z., Møller, A.P. & Saino, N. (2015). Using the birdtree.org website to obtain robust phylogenies for avian comparative studies: A primer. *Curr. Zool.*, 61, 959–965.
- Senar, J.C. & Pascual, J. (1997). Keel and tarsus length may provide a good predictor of avian body size. *Ardea*, 85, 269–274.
- Symonds, M.R.E. & Tattersall, G.J. (2010). Geographical Variation in Bill Size across Bird Species Provides Evidence for Allen’s Rule. *Am. Nat.*
- Vermote, E., Justice, C., Csizar, I., Eidenshink, J., Myneni, R., Baret, F., *et al.* (2014). NOAA Climate Data Record (CDR) of normalized Difference Vegetation Index (NDVI), Version 4. *NOAA Natl. Clim. Data Cent.*
